# Supplementary material for: MgBr2-promoted enantioselective aryl addition of ArTi(OiPr)3 to ketones catalyzed by a titanium(iv) catalyst of N,N′-sulfonylated (1R,2R)-cyclohexane-1,2-diamine
Source: Royal Society of Chemistry journal article supplement (doi:10.1039/c5ra18871g), 2015-01-01

## Supporting Information

### **MgBr<sub>2</sub>-Promoted Enantioselective Aryl Addition of ArTi(OiPr)<sub>3</sub> to Ketones Catalyzed by a Titanium(IV) Catalyst of N,N'- Sulfonylated (1R,2R)-Cyclohexane-1,2-diamine**

Chao-Chi Shu,<sup>a</sup> Shuangliu Zhou<sup>\*,b</sup> and Han-Mou Gau<sup>\*,a</sup>

<sup>a</sup>*Department of Chemistry, National Chung Hsing University, Taichung 402, Taiwan*

<sup>b</sup>*Anhui Laboratory of Molecule-Based Materials, College of Chemistry and Materials  
Science, Anhui Normal University, Wuhu, Anhui 241000, China*

*E-mail: slzhou@mail.ahnu.edu.cn; [hmgau@dragon.nchu.edu.tw](mailto:hmgau@dragon.nchu.edu.tw)*

#### **Table of Contents**

|    |                                                                                           |     |
|----|-------------------------------------------------------------------------------------------|-----|
| I  | HPLC conditions of Aryl Addition Products                                                 | S2  |
| II | Copies of <sup>1</sup> H and <sup>13</sup> C NMR Spectra of Ligands and Addition Products | S27 |

## I. HPLC Conditions of Aryl Addition Products

1. 1-Naphthalen-2-yl-1-phenyl-ethanol (**4a**) (Table 2, entry 1, 95% ee).

|                                                                                   |                 |                        |
|-----------------------------------------------------------------------------------|-----------------|------------------------|
| 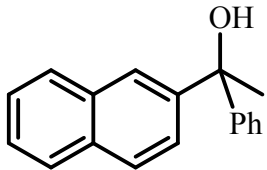 | Column:         | Chiralcel OJ           |
|                                                                                   | Eluent:         | Hexane/IPA = 80/20     |
|                                                                                   | Flow rate:      | 1 mL/min               |
|                                                                                   | Detector:       | UV, 254 nm             |
|                                                                                   | Retention time: | 14.589 min, 17.673 min |

| Racemic standard                                                                   |                     |                     | Catalytic Reaction Product                                                          |          |        |
|------------------------------------------------------------------------------------|---------------------|---------------------|-------------------------------------------------------------------------------------|----------|--------|
| 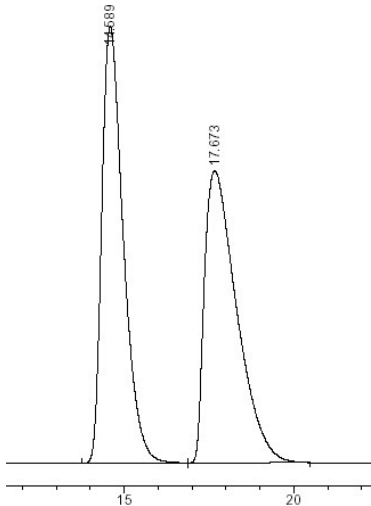 |                     |                     |  |          |        |
| Peak No.                                                                           | 1                   | 2                   | Peak No.                                                                            | 1        | 2      |
| Time                                                                               | 14.589              | 17.673              | Time                                                                                | 14.073   | 17.439 |
| Height (mAU)                                                                       | 731.907             | 489.963             | Height (mAU)                                                                        | 66.324   | 1.270  |
| Area (mAU-s)                                                                       | $3.223 \times 10^4$ | $3.226 \times 10^4$ | Area (mAU-s)                                                                        | 3095.531 | 79.937 |
| Area (%)                                                                           | 49.973              | 50.026              | Area (%)                                                                            | 97.483   | 2.517  |

### Catalytic Reaction Conditions:

2'-acetonaphthone: 0.5 mmol, **1h**: 10 mol%, MgBr<sub>2</sub>: 20 mol%, TiPh(O<sup>i</sup>Pr)<sub>3</sub>: 0.95 mmol, 0 °C, toluene: 5 mL, 16 h.

2. 1-Naphthalen-1-yl-1-phenyl-ethanol (**4b**)(Table 2, entry 2, 86% ee).

|                                                                                   |                 |                        |
|-----------------------------------------------------------------------------------|-----------------|------------------------|
| 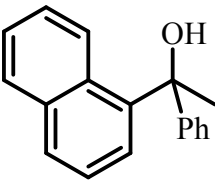 | Column:         | Chiralcel OJ           |
|                                                                                   | Eluent:         | Hexane/IPA = 90/10     |
|                                                                                   | Flow rate:      | 1 mL/min               |
|                                                                                   | Detector:       | UV, 254 nm             |
|                                                                                   | Retention time: | 12.804 min, 17.963 min |

| Racemic standard                                                                   |          |          | Catalytic Reaction Product                                                          |          |         |
|------------------------------------------------------------------------------------|----------|----------|-------------------------------------------------------------------------------------|----------|---------|
| 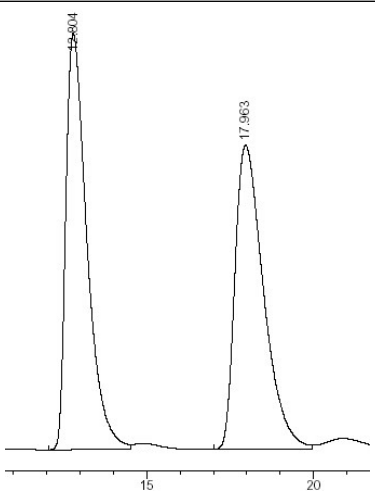 |          |          |  |          |         |
| Peak No.                                                                           | 1        | 2        | Peak No.                                                                            | 1        | 2       |
| Time                                                                               | 12.804   | 17.963   | Time                                                                                | 11.627   | 16.580  |
| Height (mAU)                                                                       | 186.591  | 136.297  | Height (mAU)                                                                        | 108.484  | 7.280   |
| Area (mAU-s)                                                                       | 8162.958 | 8114.976 | Area (mAU-s)                                                                        | 7011.706 | 516.543 |
| Area (%)                                                                           | 50.147   | 49.852   | Area (%)                                                                            | 93.139   | 6.861   |

**Catalytic Reaction Conditions:**

1'-acetonaphthone: 0.5 mmol, **1h**: 10 mol%, MgBr<sub>2</sub>: 20 mol%, TiPh(O<sup>i</sup>Pr)<sub>3</sub>: 0.95 mmol, 0 °C, toluene: 5 mL, 72 h.

3. 1-phenyl-1-*o*-tolyl-ethanol (**4c**) (Table 2, entry 3, 94% ee)

|                                                                                   |                 |                        |
|-----------------------------------------------------------------------------------|-----------------|------------------------|
| 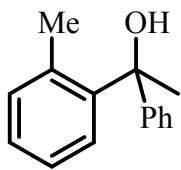 | Column:         | Chiralcel OJ           |
|                                                                                   | Eluent:         | Hexane/IPA = 95/5      |
|                                                                                   | Flow rate:      | 1 mL/min               |
|                                                                                   | Detector:       | UV, 254 nm             |
|                                                                                   | Retention time: | 12.197 min, 18.017 min |

| Racemic standard                                                                   |          |          | Catalytic Reaction Product                                                          |          |        |
|------------------------------------------------------------------------------------|----------|----------|-------------------------------------------------------------------------------------|----------|--------|
| 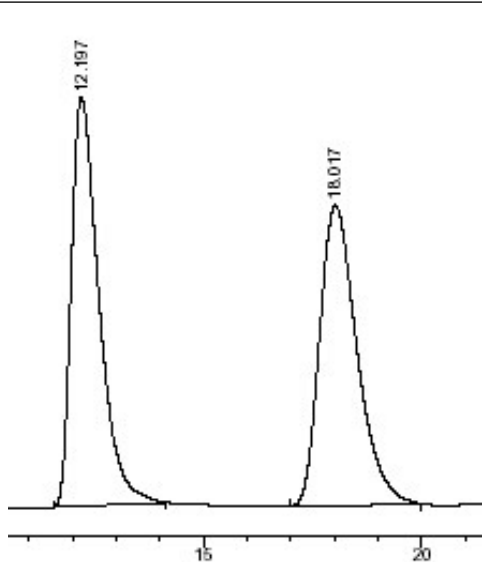 |          |          |  |          |        |
| Peak No.                                                                           | 1        | 2        | Peak No.                                                                            | 1        | 2      |
| Time                                                                               | 12.197   | 18.017   | Time                                                                                | 11.248   | 16.754 |
| Height (mAU)                                                                       | 56.667   | 41.683   | Height (mAU)                                                                        | 50.971   | 1.284  |
| Area (mAU-s)                                                                       | 2499.153 | 2468.502 | Area (mAU-s)                                                                        | 2107.530 | 68.349 |
| Area (%)                                                                           | 50.308   | 49.691   | Area (%)                                                                            | 96.859   | 3.141  |

**Catalytic Reaction Conditions:**

1'-acetonaphthone: 0.5 mmol, **1h**: 12 mol%, MgBr<sub>2</sub>: 24 mol%, TiPh(O<sup>i</sup>Pr)<sub>3</sub>: 0.95 mmol, 0 °C, toluene: 5 mL, 24 h.

4. 1-(2-Methoxyphenyl)-1-phenyl-ethanol (**4d**) (Table 2, entry 4, 34% ee)

|                                                                                   |                 |                       |
|-----------------------------------------------------------------------------------|-----------------|-----------------------|
| 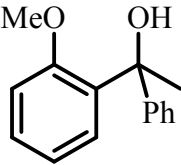 | Column:         | Chiralcel OJ          |
|                                                                                   | Eluent:         | Hexane/IPA = 80/20    |
|                                                                                   | Flow rate:      | 1 mL/min              |
|                                                                                   | Detector:       | UV, 254 nm            |
|                                                                                   | Retention time: | 6.678 min, 19.958 min |

| Racemic standard                                                                   |          |          | Catalytic Reaction Product                                                          |          |         |
|------------------------------------------------------------------------------------|----------|----------|-------------------------------------------------------------------------------------|----------|---------|
| 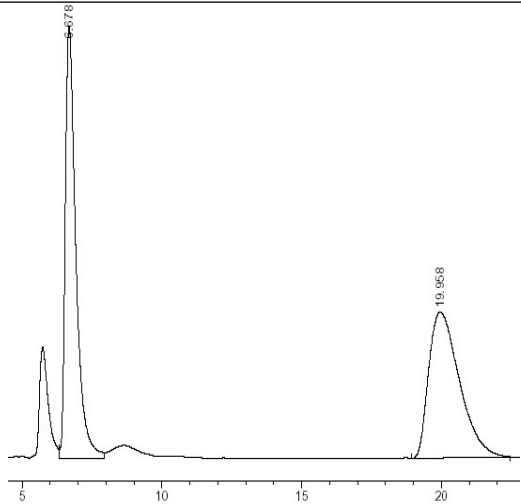 |          |          |  |          |         |
| Peak No.                                                                           | 1        | 2        | Peak No.                                                                            | 1        | 2       |
| Time                                                                               | 6.678    | 19.958   | Time                                                                                | 6.788    | 21.011  |
| Height (mAU)                                                                       | 120.649  | 40.907   | Height (mAU)                                                                        | 43.710   | 6.766   |
| Area (mAU-s)                                                                       | 3173.506 | 3124.634 | Area (mAU-s)                                                                        | 1730.966 | 855.851 |
| Area (%)                                                                           | 50.388   | 49.612   | Area (%)                                                                            | 66.915   | 33.085  |

**Catalytic Reaction Conditions:**

1'-acetonaphthone: 0.5 mmol, **1h**: 12 mol%, MgBr<sub>2</sub>: 24 mol%, TiPh(O<sup>i</sup>Pr)<sub>3</sub>: 0.95 mmol, 0 °C, toluene: 5 mL, 36 h.

5. 1-(3-Methoxyphenyl)-1-phenylethanol (**4e**)(Table 2, entry 5, 93% ee)

|                                                                                   |                 |                        |
|-----------------------------------------------------------------------------------|-----------------|------------------------|
| 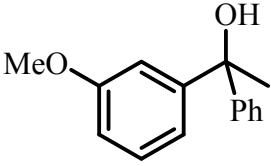 | Column:         | Chiralcel OD           |
|                                                                                   | Eluent:         | Hexane/IPA = 98/2      |
|                                                                                   | Flow rate:      | 1 mL/min               |
|                                                                                   | Detector:       | UV, 254 nm             |
|                                                                                   | Retention time: | 25.536 min, 28.937 min |

| Racemic standard                                                                   |           |           | Catalytic Reaction Product                                                          |          |        |
|------------------------------------------------------------------------------------|-----------|-----------|-------------------------------------------------------------------------------------|----------|--------|
| 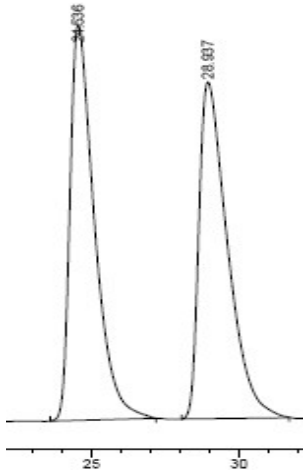 |           |           |  |          |        |
| Peak No.                                                                           | 1         | 2         | Peak No.                                                                            | 1        | 2      |
| Time                                                                               | 25.536    | 28.937    | Time                                                                                | 23.556   | 28.687 |
| Height (mAU)                                                                       | 74.2554   | 63.1799   | Height (mAU)                                                                        | 34.786   | 1.285  |
| Area (mAU-s)                                                                       | 4273.9565 | 4255.1719 | Area (mAU-s)                                                                        | 1738.220 | 66.923 |
| Area (%)                                                                           | 50.1101   | 49.8899   | Area (%)                                                                            | 96.293   | 3.707  |

**Catalytic Reaction Conditions:**

1'-acetonaphthone: 0.5 mmol, **1h**: 12 mol%, MgBr<sub>2</sub>: 24 mol%, TiPh(O<sup>i</sup>Pr)<sub>3</sub>: 0.95 mmol, 0 °C, toluene: 5 mL, 16 h.

6. 1-(4-Methoxyphenyl)-1-phenyl-ethanol (**4f**) (Table 2, entry 6, 93% ee).

|                                                                                   |                 |                        |
|-----------------------------------------------------------------------------------|-----------------|------------------------|
| 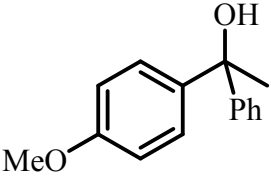 | Column:         | Chiralcel OJ           |
|                                                                                   | Eluent:         | Hexane/IPA = 80/20     |
|                                                                                   | Flow rate:      | 1 mL/min               |
|                                                                                   | Detector:       | UV, 254 nm             |
|                                                                                   | Retention time: | 18.052 min, 22.663 min |

| Racemic standard                                                                   |          |          | Catalytic Reaction Product                                                          |         |          |
|------------------------------------------------------------------------------------|----------|----------|-------------------------------------------------------------------------------------|---------|----------|
| 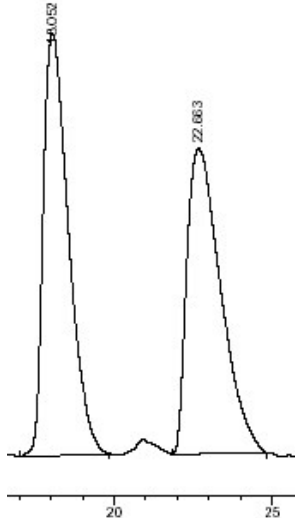 |          |          |  |         |          |
| Peak No.                                                                           | 1        | 2        | Peak No.                                                                            | 1       | 2        |
| Time                                                                               | 18.052   | 22.663   | Time                                                                                | 18.992  | 24.229   |
| Height (mAU)                                                                       | 55.824   | 40.397   | Height (mAU)                                                                        | 1.773   | 26.087   |
| Area (mAU-s)                                                                       | 3088.596 | 3007.313 | Area (mAU-s)                                                                        | 125.512 | 3449.815 |
| Area (%)                                                                           | 50.666   | 49.333   | Area (%)                                                                            | 3.511   | 96.490   |

**Catalytic Reaction Conditions:**

1'-acetonaphthone: 0.5 mmol, **1h**: 10 mol%, MgBr<sub>2</sub>: 20 mol%, TiPh(O<sup>i</sup>Pr)<sub>3</sub>: 0.95 mmol, 0 °C, toluene: 5 mL, 24 h.

7. 1-(2-Bromophenyl)-1-phenyl-ethanol (**4g**)(Table 2, entry 7, 85% ee).

|                                                                                   |                 |                      |
|-----------------------------------------------------------------------------------|-----------------|----------------------|
| 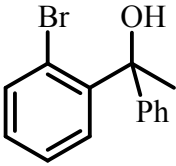 | Column:         | Chiralcel OD-H       |
|                                                                                   | Eluent:         | Hexane/IPA = 99/1    |
|                                                                                   | Flow rate:      | 1 mL/min             |
|                                                                                   | Detector:       | UV, 254 nm           |
|                                                                                   | Retention time: | 6.166 min, 7.202 min |

| Racemic standard                                                                   |           |           | Catalytic Reaction Product                                                           |          |         |
|------------------------------------------------------------------------------------|-----------|-----------|--------------------------------------------------------------------------------------|----------|---------|
| 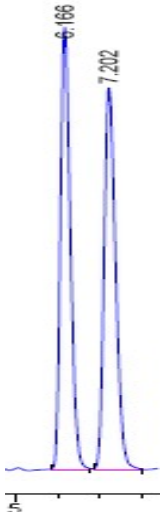 |           |           |  |          |         |
| Peak No.                                                                           | 1         | 2         | Peak No.                                                                             | 1        | 2       |
| Time                                                                               | 6.166     | 7.202     | Time                                                                                 | 6.895    | 8.208   |
| Height (mAU)                                                                       | 236.7261  | 204.1879  | Height (mAU)                                                                         | 99.140   | 6.939   |
| Area (mAU-s)                                                                       | 3790.7075 | 3803.9639 | Area (mAU-s)                                                                         | 1665.955 | 124.514 |
| Area (%)                                                                           | 49.9127   | 50.0873   | Area (%)                                                                             | 93.046   | 6.954   |

**Catalytic Reaction Conditions:**

2'-Bromoacetophenone: 0.5 mmol, **1h**: 12 mol%, MgBr<sub>2</sub>: 24 mol%, TiPh(O<sup>i</sup>Pr)<sub>3</sub>: 0.95 mmol, 0 °C, toluene: 5 mL, 72 h.



8. 1-(3-Bromophenyl)-1-phenyl-ethanol (**4h**) (Table 2, entry 8, 90% ee).

|                                                                                    |                 |          |                                                                                     |          |         |
|------------------------------------------------------------------------------------|-----------------|----------|-------------------------------------------------------------------------------------|----------|---------|
| 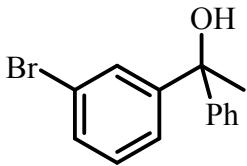  | Column:         |          | Chiralcel OD                                                                        |          |         |
|                                                                                    | Eluent:         |          | Hexane/IPA = 99/1                                                                   |          |         |
|                                                                                    | Flow rate:      |          | 1 mL/min                                                                            |          |         |
|                                                                                    | Detector:       |          | UV, 254 nm                                                                          |          |         |
|                                                                                    | Retention time: |          | 18.529 min, 19.982 min                                                              |          |         |
| Racemic standard                                                                   |                 |          | Catalytic Reaction Product                                                          |          |         |
|  |                 |          |  |          |         |
| Peak No.                                                                           | 1               | 2        | Peak No.                                                                            | 1        | 2       |
| Time                                                                               | 18.529          | 19.982   | Time                                                                                | 17.989   | 19.817  |
| Height (mAU)                                                                       | 53.103          | 47.398   | Height (mAU)                                                                        | 49.034   | 2.964   |
| Area (mAU-s)                                                                       | 2211.78         | 2246.756 | Area (mAU-s)                                                                        | 1928.094 | 100.131 |
| Area (%)                                                                           | 49.608          | 50.392   | Area (%)                                                                            | 95.063   | 4.937   |

**Catalytic Reaction Conditions:**

3'-Bromoacetophenone: 0.5 mmol, **1h**: 12 mol%, MgBr<sub>2</sub>: 24 mol%, TiPh(O<sup>i</sup>Pr)<sub>3</sub>: 0.95 mmol, 0 °C, toluene: 5 mL, 24 h.

9. 1-(4-Bromophenyl)-1-phenyl-ethanol (**4i**) (Table 2, entry 9, 88% ee).

|                                                                                   |                 |                        |
|-----------------------------------------------------------------------------------|-----------------|------------------------|
| 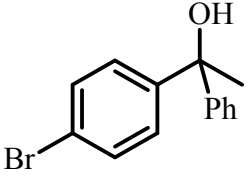 | Column:         | Chiralcel OD-H         |
|                                                                                   | Eluent:         | Hexane/IPA = 99/1      |
|                                                                                   | Flow rate:      | 1 mL/min               |
|                                                                                   | Detector:       | UV, 254 nm             |
|                                                                                   | Retention time: | 11.907 min, 13.548 min |

| Racemic standard                                                                   |          |          | Catalytic Reaction Product                                                          |          |        |
|------------------------------------------------------------------------------------|----------|----------|-------------------------------------------------------------------------------------|----------|--------|
| 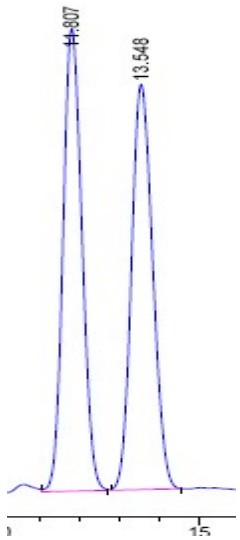 |          |          |  |          |        |
| Peak No.                                                                           | 1        | 2        | Peak No.                                                                            | 1        | 2      |
| Time                                                                               | 11.807   | 13.548   | Time                                                                                | 10.995   | 13.144 |
| Height (mAU)                                                                       | 31.051   | 27.209   | Height (mAU)                                                                        | 58.57137 | 3.538  |
| Area (mAU-s)                                                                       | 1019.858 | 1004.815 | Area (mAU-s)                                                                        | 1439.485 | 95.546 |
| Area (%)                                                                           | 50.372   | 49.628   | Area (%)                                                                            | 93.776   | 6.224  |

**Catalytic Reaction Conditions:**

1'-acetonaphthone: 0.5 mmol, **1h**: 10 mol%, MgBr<sub>2</sub>: 20 mol%, TiPh(O<sup>i</sup>Pr)<sub>3</sub>: 0.95 mmol, 0 °C, toluene: 5 mL, 16 h.

10. 1-(2-Chlorophenyl)-1-phenyl-ethanol (**4j**) (Table 2, entry 10, 80% ee)

|                                                                                   |                 |                      |
|-----------------------------------------------------------------------------------|-----------------|----------------------|
| 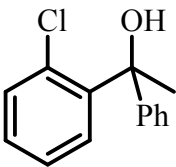 | Column:         | Chiralcel OD-H       |
|                                                                                   | Eluent:         | Hexane/IPA = 99/1    |
|                                                                                   | Flow rate:      | 1 mL/min             |
|                                                                                   | Detector:       | UV, 254 nm           |
|                                                                                   | Retention time: | 6.203 min, 7.244 min |

| Racemic standard                                                                   |          |         | Catalytic Reaction Product                                                          |         |        |
|------------------------------------------------------------------------------------|----------|---------|-------------------------------------------------------------------------------------|---------|--------|
|  |          |         |  |         |        |
| Peak No.                                                                           | 1        | 2       | Peak No.                                                                            | 1       | 2      |
| Time                                                                               | 6.203    | 7.244   | Time                                                                                | 6.220   | 7.066  |
| Height (mAU)                                                                       | 286.004  | 250.572 | Height (mAU)                                                                        | 26.053  | 2.653  |
| Area (mAU-s)                                                                       | 5065.582 | 48.657  | Area (mAU-s)                                                                        | 350.191 | 39.911 |
| Area (%)                                                                           | 5345.219 | 51.343  | Area (%)                                                                            | 89.769  | 10.231 |

**Catalytic Reaction Conditions:**

1'-acetonaphthone: 0.5 mmol, **1h**: 12 mol%, MgBr<sub>2</sub>: 24 mol%, TiPh(O<sup>i</sup>Pr)<sub>3</sub>: 0.95 mmol, 0 °C, toluene: 5 mL, 36 h.

11. 1-(3-Chlorophenyl)-1-phenyl-ethanol (**4k**) (Table 2, entry 11, 90% ee)

|                                                                                   |                 |                       |
|-----------------------------------------------------------------------------------|-----------------|-----------------------|
| 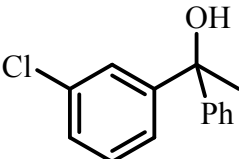 | Column:         | Chiralcel OJ          |
|                                                                                   | Eluent:         | Hexane/IPA = 97/3     |
|                                                                                   | Flow rate:      | 1 mL/min              |
|                                                                                   | Detector:       | UV, 254 nm            |
|                                                                                   | Retention time: | 15.406min, 17.609 min |

| Racemic standard                                                                   |         |          | Catalytic Reaction Product                                                          |          |        |
|------------------------------------------------------------------------------------|---------|----------|-------------------------------------------------------------------------------------|----------|--------|
| 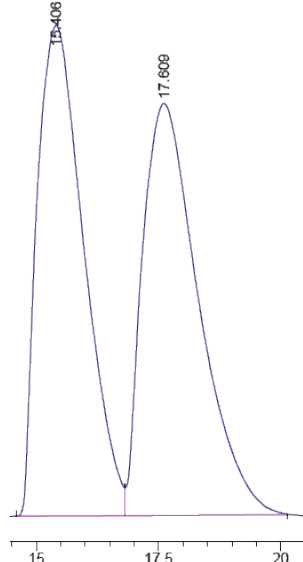 |         |          |  |          |        |
| Peak No.                                                                           | 1       | 2        | Peak No.                                                                            | 1        | 2      |
| Time                                                                               | 15.406  | 17.609   | Time                                                                                | 14.621   | 16.961 |
| Height (mAU)                                                                       | 66.665  | 55.981   | Height (mAU)                                                                        | 26.596   | 9.474  |
| Area (mAU-s)                                                                       | 4414.11 | 4464.991 | Area (mAU-s)                                                                        | 1611.219 | 39.527 |
| Area (%)                                                                           | 49.714  | 50.286   | Area (%)                                                                            | 97.606   | 2.394  |

**Catalytic Reaction Conditions:**

1'-acetonaphthone: 0.5 mmol, **1h**: 12 mol%, MgBr<sub>2</sub>: 24 mol%, TiPh(O<sup>i</sup>Pr)<sub>3</sub>: 0.95 mmol, 0 °C, toluene: 5 mL, 24 h.

12. 1-(4-Chlorophenyl)-1-phenyl-ethanol (**4I**) (Table 2, entry 12, 85% ee).

|                                                                                   |                 |                        |
|-----------------------------------------------------------------------------------|-----------------|------------------------|
| 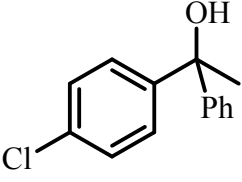 | Column:         | Chiralcel AD           |
|                                                                                   | Eluent:         | Hexane/IPA = 99/1      |
|                                                                                   | Flow rate:      | 1 mL/min               |
|                                                                                   | Detector:       | UV, 254 nm             |
|                                                                                   | Retention time: | 18.197 min, 20.087 min |

| Racemic standard                                                                   |          |          | Catalytic Reaction Product                                                          |         |          |
|------------------------------------------------------------------------------------|----------|----------|-------------------------------------------------------------------------------------|---------|----------|
| 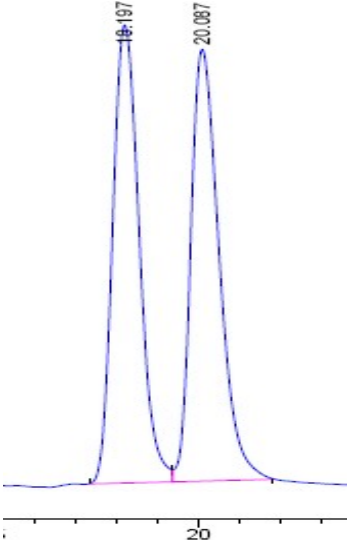 |          |          |  |         |          |
| Peak No.                                                                           | 1        | 2        | Peak No.                                                                            | 1       | 2        |
| Time                                                                               | 18.197   | 20.087   | Time                                                                                | 18.721  | 20.827   |
| Height (mAU)                                                                       | 66.275   | 62.460   | Height (mAU)                                                                        | 10.303  | 93.109   |
| Area (mAU-s)                                                                       | 2972.738 | 2991.497 | Area (mAU-s)                                                                        | 330.591 | 4002.524 |
| Area (%)                                                                           | 49.843   | 50.157   | Area (%)                                                                            | 7.629   | 92.371   |

**Catalytic Reaction Conditions:**

1'-acetonaphthone: 0.5 mmol, **1h**: 12 mol%, MgBr<sub>2</sub>: 24 mol%, TiPh(O<sup>i</sup>Pr)<sub>3</sub>: 0.95 mmol, 0 °C, toluene: 5 mL, 24 h.

13. 1-(4-trifluoromethylphenyl)-1-phenyl-ethanol (**4m**) (Table 2, entry 13, 87% ee)

|  |                 |                        |
|--|-----------------|------------------------|
|  | Column:         | Chiralcel AD           |
|  | Eluent:         | Hexane/IPA = 99/1      |
|  | Flow rate:      | 1 mL/min               |
|  | Detector:       | UV, 254 nm             |
|  | Retention time: | 13.744 min, 15.408 min |

| Racemic standard |          |          | Catalytic Reaction Product |          |         |
|------------------|----------|----------|----------------------------|----------|---------|
|                  |          |          |                            |          |         |
| Peak No.         | 1        | 2        | Peak No.                   | 1        | 2       |
| Time             | 13.744   | 15.408   | Time                       | 13.240   | 14.387  |
| Height (mAU)     | 8.2054   | 7.6166   | Height (mAU)               | 112.193  | 963.729 |
| Area (mAU-s)     | 376.8533 | 360.0422 | Area (mAU-s)               | 2521.834 | 3.494   |
| Area (%)         | 51.1407  | 48.8593  | Area (%)                   | 6.731    | 93.269  |

**Catalytic Reaction Conditions:**

1'-acetonaphthone: 0.5 mmol, **1h**: 12 mol%, MgBr<sub>2</sub>: 24 mol%, TiPh(O<sup>i</sup>Pr)<sub>3</sub>: 0.95 mmol, 0 °C, toluene: 5 mL, 24 h.

14. 1-(4-Nitrophenyl)-1-phenyl-ethanol (**4n**) (Table 2, entry 14, 67% ee)

|                                                                                   |                 |                        |
|-----------------------------------------------------------------------------------|-----------------|------------------------|
| 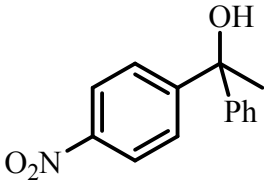 | Column:         | Chiralcel OJ           |
|                                                                                   | Eluent:         | Hexane/IPA = 90/10     |
|                                                                                   | Flow rate:      | 1 mL/min               |
|                                                                                   | Detector:       | UV, 254 nm             |
|                                                                                   | Retention time: | 30.005 min, 35.645 min |

| Racemic standard                                                                   |          |          | Catalytic Reaction Product                                                          |          |        |
|------------------------------------------------------------------------------------|----------|----------|-------------------------------------------------------------------------------------|----------|--------|
| 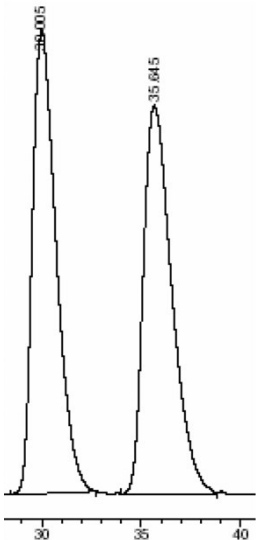 |          |          |  |          |        |
| Peak No.                                                                           | 1        | 2        | Peak No.                                                                            | 1        | 2      |
| Time                                                                               | 30.005   | 35.645   | Time                                                                                | 31.125   | 37.693 |
| Height (mAU)                                                                       | 84.264   | 70.742   | Height (mAU)                                                                        | 22.037   | 81.856 |
| Area (mAU-s)                                                                       | 6985.151 | 7011.107 | Area (mAU-s)                                                                        | 2476.117 | 1.264  |
| Area (%)                                                                           | 49.907   | 50.092   | Area (%)                                                                            | 16.383   | 83.617 |

**Catalytic Reaction Conditions:**

1'-acetonaphthone: 0.5 mmol, **1h**: 12 mol%, MgBr<sub>2</sub>: 24 mol%, TiPh(O<sup>*i*</sup>Pr)<sub>3</sub>: 0.95 mmol, 0 °C, toluene: 5 mL, 24 h.

15. 1-(Furan-2-yl)-1-phenyl-ethanol (**4o**) (Table 2, entry 15, 82% ee)

|                                                                                   |                 |                        |
|-----------------------------------------------------------------------------------|-----------------|------------------------|
| 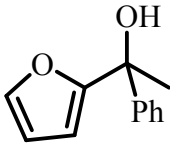 | Column:         | Chiralcel OD           |
|                                                                                   | Eluent:         | Hexane/IPA = 99/1      |
|                                                                                   | Flow rate:      | 1 mL/min               |
|                                                                                   | Detector:       | UV, 254 nm             |
|                                                                                   | Retention time: | 12.198 min, 13.781 min |

| Racemic standard                                                                   |          |          | Catalytic Reaction Product                                                          |        |         |
|------------------------------------------------------------------------------------|----------|----------|-------------------------------------------------------------------------------------|--------|---------|
| 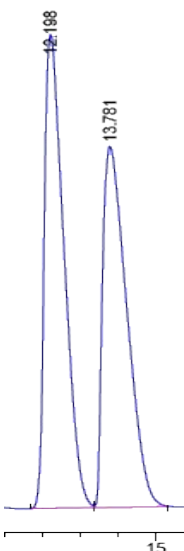 |          |          |  |        |         |
| Peak No.                                                                           | 1        | 2        | Peak No.                                                                            | 1      | 2       |
| Time                                                                               | 12.198   | 13.781   | Time                                                                                | 11.928 | 13.289  |
| Height (mAU)                                                                       | 307.4265 | 234.2073 | Height (mAU)                                                                        | 2.159  | 17.708  |
| Area (mAU-s)                                                                       | 11142.6  | 10469.8  | Area (mAU-s)                                                                        | 45.468 | 457.269 |
| Area (%)                                                                           | 51.5566  | 48.4434  | Area (%)                                                                            | 9.044  | 90.956  |

**Catalytic Reaction Conditions:**

1'-acetonaphthone: 0.5 mmol, **1h**: 12 mol%, MgBr<sub>2</sub>: 24 mol%, TiPh(O<sup>i</sup>Pr)<sub>3</sub>: 0.95 mmol, 0 °C, toluene: 5 mL, 24 h.



16. 2,4-Diphenyl-but-3-en-2-ol (**4p**) (Table 2, entry 16, 84% ee)

|                                                                                   |                 |                        |
|-----------------------------------------------------------------------------------|-----------------|------------------------|
| 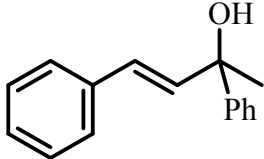 | Column:         | Chiralcel OD           |
|                                                                                   | Eluent:         | Hexane/IPA = 95/5      |
|                                                                                   | Flow rate:      | 1 mL/min               |
|                                                                                   | Detector:       | UV, 254 nm             |
|                                                                                   | Retention time: | 13.067 min, 16.734 min |

| Racemic standard                                                                   |          |          | Catalytic Reaction Product                                                          |                       |          |
|------------------------------------------------------------------------------------|----------|----------|-------------------------------------------------------------------------------------|-----------------------|----------|
| 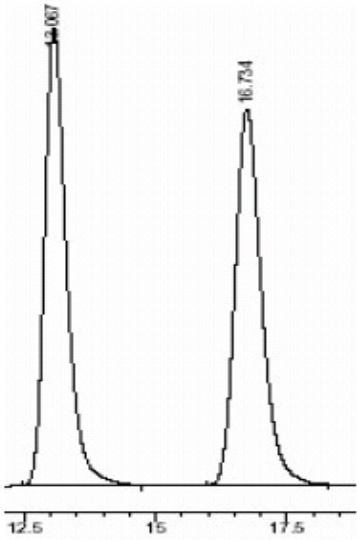 |          |          |  |                       |          |
| Peak No.                                                                           | 1        | 2        | Peak No.                                                                            | 1                     | 2        |
| Time                                                                               | 13.067   | 16.734   | Time                                                                                | 12.262                | 15.682   |
| Height (mAU)                                                                       | 165.473  | 135.582  | Height (mAU)                                                                        | 1811.658              | 122.743  |
| Area (mAU-s)                                                                       | 4742.026 | 4721.952 | Area (mAU-s)                                                                        | 4.590×10 <sup>4</sup> | 3909.238 |
| Area (%)                                                                           | 50.106   | 49.893   | Area (%)                                                                            | 92.151                | 7.849    |

**Catalytic Reaction Conditions:**

1'-acetonaphthone: 0.5 mmol, **1h**: 12 mol%, MgBr<sub>2</sub>: 24 mol%, TiPh(O<sup>i</sup>Pr)<sub>3</sub>: 0.95 mmol, 0 °C, toluene: 5 mL, 18 h.

17. 1-(Cyclohexen-1-yl)-1-phenyl-ethanol(**4q**) (Table 2, entry 17, 71% ee)

|                                                                                   |                 |                      |
|-----------------------------------------------------------------------------------|-----------------|----------------------|
| 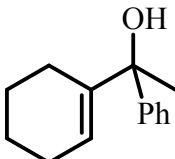 | Column:         | Chiralcel OD-H       |
|                                                                                   | Eluent:         | Hexane/IPA = 99/1    |
|                                                                                   | Flow rate:      | 1 mL/min             |
|                                                                                   | Detector:       | UV, 254 nm           |
|                                                                                   | Retention time: | 6.823 min, 7.982 min |

| Racemic standard                                                                   |         |         | Catalytic Reaction Product                                                          |         |         |
|------------------------------------------------------------------------------------|---------|---------|-------------------------------------------------------------------------------------|---------|---------|
| 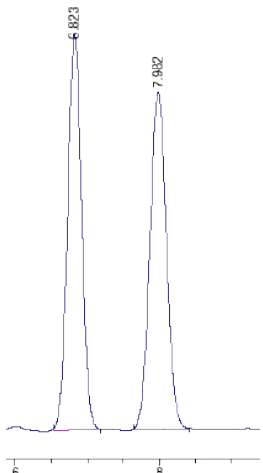 |         |         |  |         |         |
| Peak No.                                                                           | 1       | 2       | Peak No.                                                                            | 1       | 2       |
| Time                                                                               | 6.823   | 7.982   | Time                                                                                | 5.263   | 5.908   |
| Height (mAU)                                                                       | 7.466   | 6.364   | Height (mAU)                                                                        | 87.871  | 13.342  |
| Area (mAU-s)                                                                       | 100.555 | 101.523 | Area (mAU-s)                                                                        | 972.832 | 167.848 |
| Area (%)                                                                           | 49.760  | 50.239  | Area (%)                                                                            | 85.285  | 14.714  |

**Catalytic Reaction Conditions:**

1'-acetonaphthone: 0.5 mmol, **1h**: 12 mol%, MgBr<sub>2</sub>: 24 mol%, TiPh(O<sup>i</sup>Pr)<sub>3</sub>: 0.95 mmol, 0 °C, toluene: 5 mL, 48 h.

18. 2-Phenyl-hexan-2-ol (**4r**) (Table 2, entry 18, 13% ee)

|                                                                                   |                 |                       |
|-----------------------------------------------------------------------------------|-----------------|-----------------------|
| 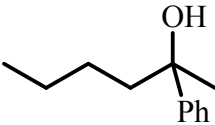 | Column:         | Chiralcel OJ          |
|                                                                                   | Eluent:         | Hexane/IPA = 99/1     |
|                                                                                   | Flow rate:      | 1 mL/min              |
|                                                                                   | Detector:       | UV, 254 nm            |
|                                                                                   | Retention time: | 9.135 min, 13.045 min |

| Racemic standard                                                                   |         |         | Catalytic Reaction Product                                                          |         |        |
|------------------------------------------------------------------------------------|---------|---------|-------------------------------------------------------------------------------------|---------|--------|
| 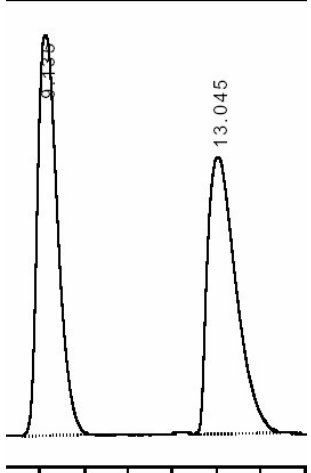 |         |         |  |         |        |
| Peak No.                                                                           | 1       | 2       | Peak No.                                                                            | 1       | 2      |
| Time                                                                               | 9.135   | 13.045  | Time                                                                                | 7.972   | 10.936 |
| Height (mAU)                                                                       | 68200   | 46998   | Height (mAU)                                                                        | 8.118   | 6.484  |
| Area (mAU-s)                                                                       | 1984825 | 1983039 | Area (mAU-s)                                                                        | 252.862 | 301.0  |
| Area (%)                                                                           | 50.022  | 49.977  | Area (%)                                                                            | 45.490  | 54.510 |

**Catalytic Reaction Conditions:**

1'-acetonaphthone: 0.5 mmol, **1h**: 12 mol%, MgBr<sub>2</sub>: 24 mol%, TiPh(O<sup>i</sup>Pr)<sub>3</sub>: 0.95 mmol, 0 °C, toluene: 5 mL, 24 h.

19. 3-Methyl-2-Phenyl-butan-2-ol (**4s**) (Table 2, entry 19, 7% ee)

|                                                                                   |                 |                        |
|-----------------------------------------------------------------------------------|-----------------|------------------------|
| 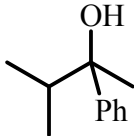 | Column:         | Chiralcel OJ           |
|                                                                                   | Eluent:         | Hexane/IPA = 99/1      |
|                                                                                   | Flow rate:      | 1 mL/min               |
|                                                                                   | Detector:       | UV, 254 nm             |
|                                                                                   | Retention time: | 13.086 min, 20.053 min |

| Racemic standard                                                                   |         |         | Catalytic Reaction Product                                                          |          |          |
|------------------------------------------------------------------------------------|---------|---------|-------------------------------------------------------------------------------------|----------|----------|
| 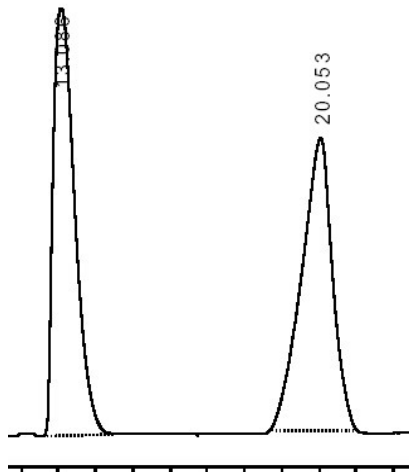 |         |         |  |          |          |
| Peak No.                                                                           | 1       | 2       | Peak No.                                                                            | 1        | 2        |
| Time                                                                               | 13.086  | 20.053  | Time                                                                                | 10.611   | 16.818   |
| Height (mAU)                                                                       | 169125  | 115218  | Height (mAU)                                                                        | 153.143  | 93.587   |
| Area (mAU-s)                                                                       | 6266740 | 6320229 | Area (mAU-s)                                                                        | 7869.380 | 6905.077 |
| Area (%)                                                                           | 49.787  | 50.212  | Area (%)                                                                            | 53.263   | 46.737   |

**Catalytic Reaction Conditions:**

1'-acetonaphthone: 0.5 mmol, **1h**: 12 mol%, MgBr<sub>2</sub>: 24 mol%, TiPh(O<sup>i</sup>Pr)<sub>3</sub>: 0.95 mmol, 0 °C, toluene: 5 mL, 24 h.

20. 2-Bromo-1-(naphthalen-2-yl)-1-phenyl-ethanol (**4t**) (Table 2, entry 20, 78% ee)

|                                                                                   |                 |                        |
|-----------------------------------------------------------------------------------|-----------------|------------------------|
| 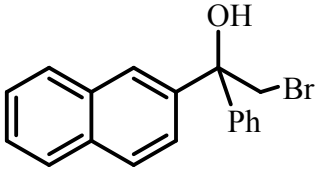 | Column:         | Chiralcel OD           |
|                                                                                   | Eluent:         | Hexane/IPA = 99/1      |
|                                                                                   | Flow rate:      | 1 mL/min               |
|                                                                                   | Detector:       | UV, 254 nm             |
|                                                                                   | Retention time: | 34.164 min, 36.529 min |

| Racemic standard                                                                   |          |          | Catalytic Reaction Product                                                          |          |         |
|------------------------------------------------------------------------------------|----------|----------|-------------------------------------------------------------------------------------|----------|---------|
| 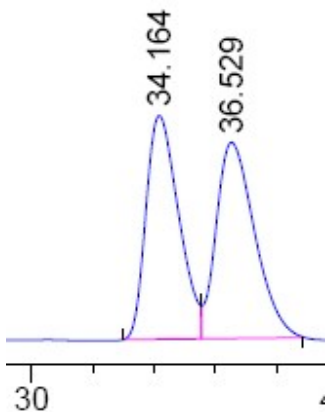 |          |          |  |          |         |
| Peak No.                                                                           | 1        | 2        | Peak No.                                                                            | 1        | 2       |
| Time                                                                               | 34.164   | 36.529   | Time                                                                                | 31.983   | 34.267  |
| Height (mAU)                                                                       | 98.1797  | 86.0638  | Height (mAU)                                                                        | 41.870   | 5.309   |
| Area (mAU-s)                                                                       | 7341.985 | 7555.035 | Area (mAU-s)                                                                        | 2804.885 | 371.020 |
| Area (%)                                                                           | 49.2849  | 50.7151  | Area (%)                                                                            | 88.318   | 11.682  |

**Catalytic Reaction Conditions:**

$\alpha$ -bromo-2'-acetophenone: 0.5 mmol, **1h**: 12 mol%, MgBr<sub>2</sub>: 24 mol%, TiPh(O<sup>i</sup>Pr)<sub>3</sub>: 0.95 mmol, 0 °C, toluene: 5 mL, 24 h.

21 1-(Naphthalen-2-yl)-1-(*p*-tolyl)ethanol (**4u**) (Table 2, entry 21, 93% ee)

|                                                                                   |                 |                       |
|-----------------------------------------------------------------------------------|-----------------|-----------------------|
| 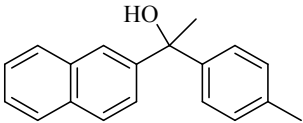 | Column:         | Chiralcel OJ          |
|                                                                                   | Eluent:         | Hexane/IPA = 70/30    |
|                                                                                   | Flow rate:      | 1 mL/min              |
|                                                                                   | Detector:       | UV, 254 nm            |
|                                                                                   | Retention time: | 9.785 min, 15.191 min |

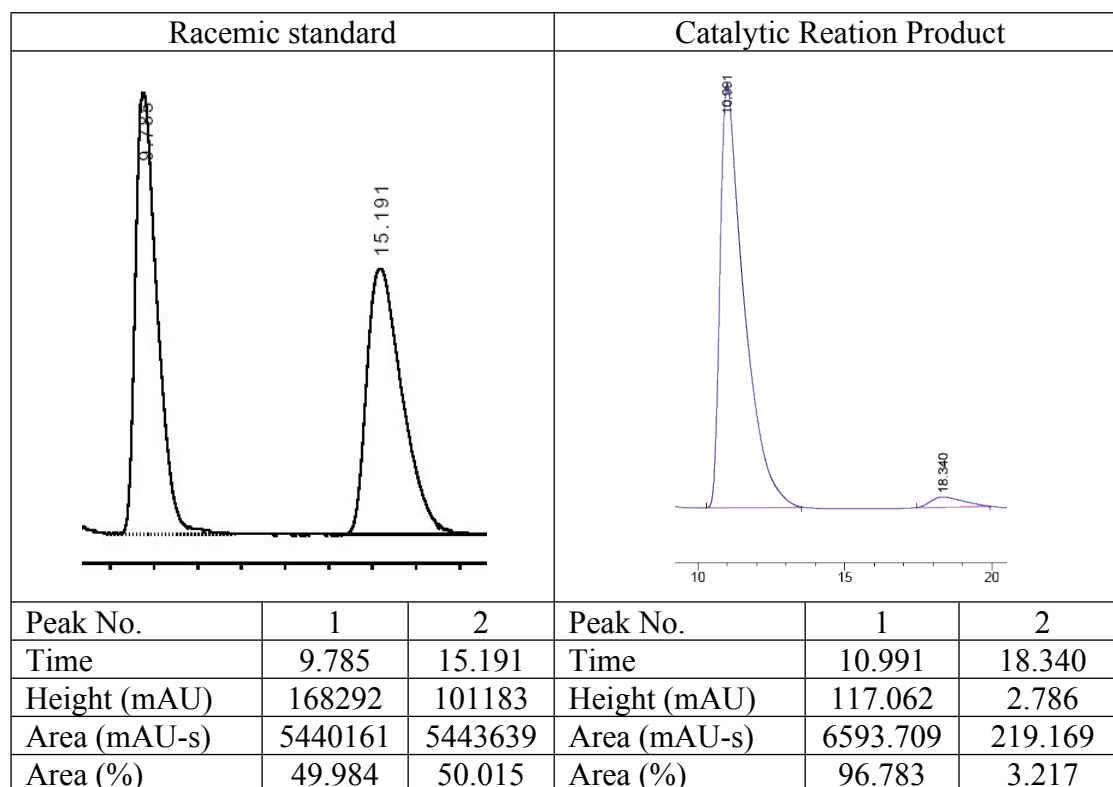

**Catalytic Reaction Conditions:**

2'-acetonaphthone: 0.5 mmol, **1h**: 12 mol%, MgBr<sub>2</sub>: 24 mol%, TiPh(O<sup>*i*</sup>Pr)<sub>3</sub>: 0.95 mmol, 0 °C, toluene: 5 mL, 24 h.

22. 1-(4-Chlorophenyl)-1-phenyl-ethanol (**4l'**) (Table 2, entry 22, 91% ee)

|                                                                                   |                 |                        |
|-----------------------------------------------------------------------------------|-----------------|------------------------|
| 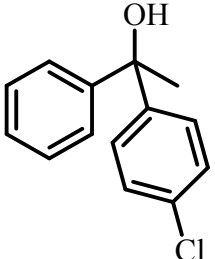 | Column:         | Chiralcel OD-H         |
|                                                                                   | Eluent:         | Hexane/IPA = 99/1      |
|                                                                                   | Flow rate:      | 1 mL/min               |
|                                                                                   | Detector:       | UV, 254 nm             |
|                                                                                   | Retention time: | 18.197 min, 20.087 min |

| Racemic standard                                                                   |          |          | Catalytic Reaction Product                                                          |          |        |
|------------------------------------------------------------------------------------|----------|----------|-------------------------------------------------------------------------------------|----------|--------|
| 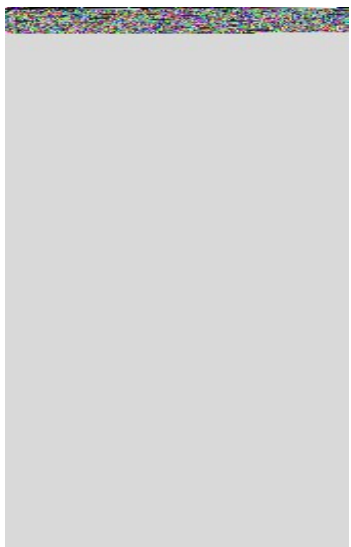 |          |          |  |          |        |
| Peak No.                                                                           | 1        | 2        | Peak No.                                                                            | 1        | 2      |
| Time                                                                               | 18.197   | 20.087   | Time                                                                                | 17.652   | 20.099 |
| Height (mAU)                                                                       | 66.275   | 62.460   | Height (mAU)                                                                        | 46.255   | 1.772  |
| Area (mAU-s)                                                                       | 2972.738 | 2991.497 | Area (mAU-s)                                                                        | 1466.223 | 64.259 |
| Area (%)                                                                           | 49.843   | 50.157   | Area (%)                                                                            | 95.801   | 4.199  |

**Catalytic Reaction Conditions:**

1'-acetophenone: 0.5 mmol, **1h**: 12 mol%, MgBr<sub>2</sub>: 24 mol%, TiPh(O<sup>i</sup>Pr)<sub>3</sub>: 0.95 mmol, 0 °C, toluene: 5 mL, 24 h.

22. 1-(4-Methoxyphenyl)-1-phenyl-ethanol (**4f**) (Table 2, entry 22, 90% ee)

|                                                                                   |                 |                        |
|-----------------------------------------------------------------------------------|-----------------|------------------------|
| 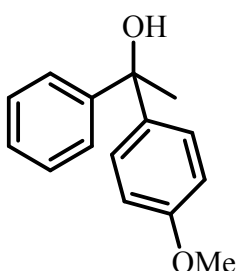 | Column:         | Chiralcel OJ           |
|                                                                                   | Eluent:         | Hexane/IPA = 80/20     |
|                                                                                   | Flow rate:      | 1 mL/min               |
|                                                                                   | Detector:       | UV, 254 nm             |
|                                                                                   | Retention time: | 18.052 min, 22.663 min |

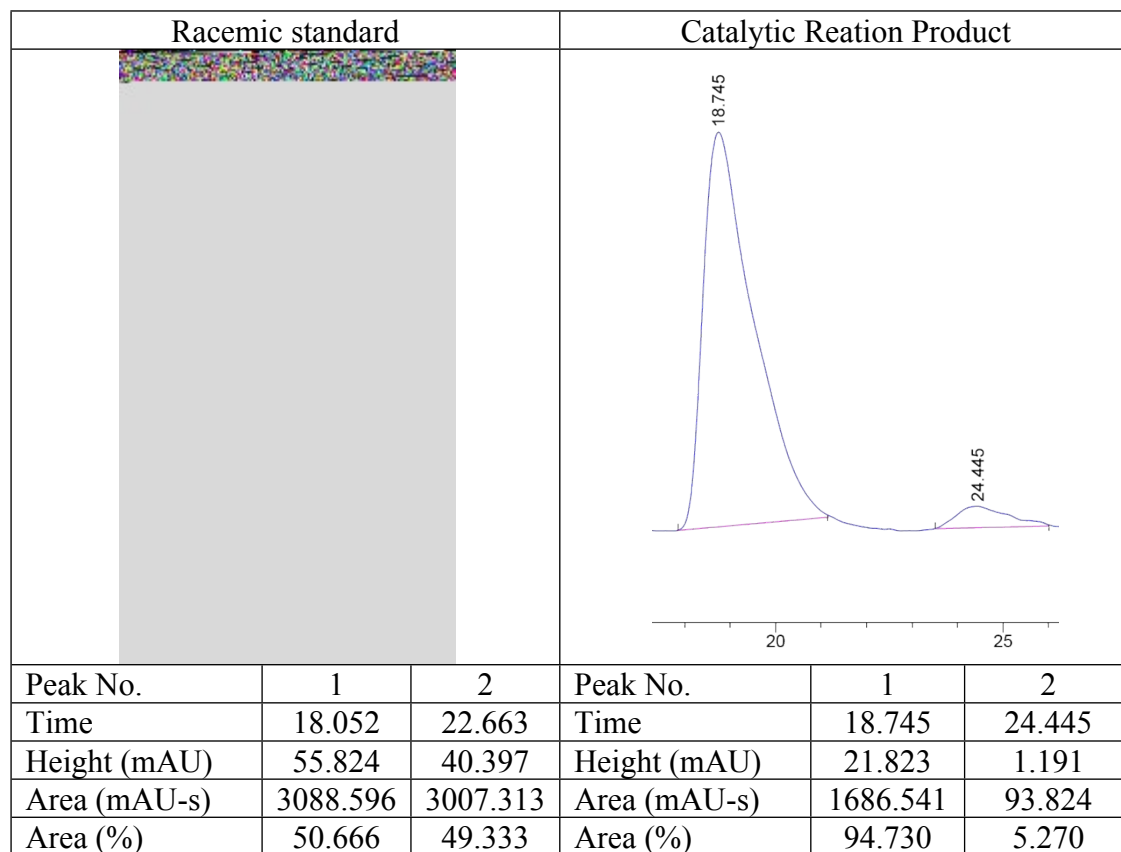

**Catalytic Reaction Conditions:**

1'-acetophenone: 0.5 mmol, **1h**: 12 mol%, MgBr<sub>2</sub>: 24 mol%, TiPh(O<sup>i</sup>Pr)<sub>3</sub>: 0.95 mmol, 0 °C, toluene: 5 mL, 24 h.



23. 1-(4-Trifluoromethylphenyl)-1-phenyl-ethanol (**4n'**) (Table 2, entry 23, 93% ee)

|                                                                                   |                 |                        |
|-----------------------------------------------------------------------------------|-----------------|------------------------|
| 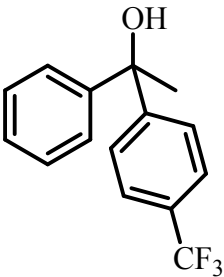 | Column:         | Chiralcel AD           |
|                                                                                   | Eluent:         | Hexane/IPA = 99/1      |
|                                                                                   | Flow rate:      | 1 mL/min               |
|                                                                                   | Detector:       | UV, 254 nm             |
|                                                                                   | Retention time: | 13.744 min, 15.408 min |

| Racemic standard                                                                   |          |          | Catalytic Reaction Product                                                          |          |        |
|------------------------------------------------------------------------------------|----------|----------|-------------------------------------------------------------------------------------|----------|--------|
| 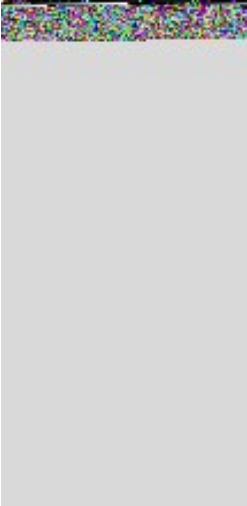 |          |          |  |          |        |
| Peak No.                                                                           | 1        | 2        | Peak No.                                                                            | 1        | 2      |
| Time                                                                               | 13.744   | 15.408   | Time                                                                                | 13.310   | 14.961 |
| Height (mAU)                                                                       | 8.2054   | 7.6166   | Height (mAU)                                                                        | 91.494   | 2.691  |
| Area (mAU-s)                                                                       | 376.8533 | 360.0422 | Area (mAU-s)                                                                        | 2177.172 | 67.132 |
| Area (%)                                                                           | 51.1407  | 48.8593  | Area (%)                                                                            | 97.009   | 2.991  |

**Catalytic Reaction Conditions:**

1'-acetophenone: 0.5 mmol, **1h**: 12 mol%, MgBr<sub>2</sub>: 24 mol%, TiPh(O<sup>i</sup>Pr)<sub>3</sub>: 0.95 mmol, 0 °C, toluene: 5 mL, 24 h.

24. 1-(Naphthalen-2-yl)-1-phenyl-ethanol (**4a'**) (Table 2, entry 24, 92% ee)

|                                                                                   |                 |                        |
|-----------------------------------------------------------------------------------|-----------------|------------------------|
| 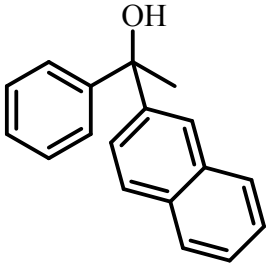 | Column:         | Chiralcel OJ           |
|                                                                                   | Eluent:         | Hexane/IPA = 80/20     |
|                                                                                   | Flow rate:      | 1 mL/min               |
|                                                                                   | Detector:       | UV, 254 nm             |
|                                                                                   | Retention time: | 14.589 min, 17.673 min |

| Racemic standard                                                                   |                     |                     | Catalytic Reaction Product                                                          |         |          |
|------------------------------------------------------------------------------------|---------------------|---------------------|-------------------------------------------------------------------------------------|---------|----------|
| 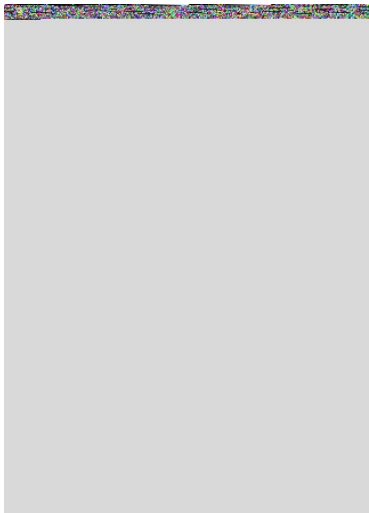 |                     |                     |  |         |          |
| Peak No.                                                                           | 1                   | 2                   | Peak No.                                                                            | 1       | 2        |
| Time                                                                               | 14.589              | 17.673              | Time                                                                                | 14.689  | 18.060   |
| Height (mAU)                                                                       | 731.907             | 489.963             | Height (mAU)                                                                        | 6.328   | 97.729   |
| Area (mAU-s)                                                                       | $3.223 \times 10^4$ | $3.226 \times 10^4$ | Area (mAU-s)                                                                        | 341.546 | 7840.168 |
| Area (%)                                                                           | 49.973              | 50.026              | Area (%)                                                                            | 4.175   | 95.825   |

**Catalytic Reaction Conditions:**

1'-acetophenone: 0.5 mmol, **1h**: 12 mol%, MgBr<sub>2</sub>: 24 mol%, TiPh(O<sup>i</sup>Pr)<sub>3</sub>: 0.95 mmol, 0°C, toluene: 5 mL, 48 h.

## II. Copies of $^1\text{H}$ and $^{13}\text{C}$ NMR Spectra

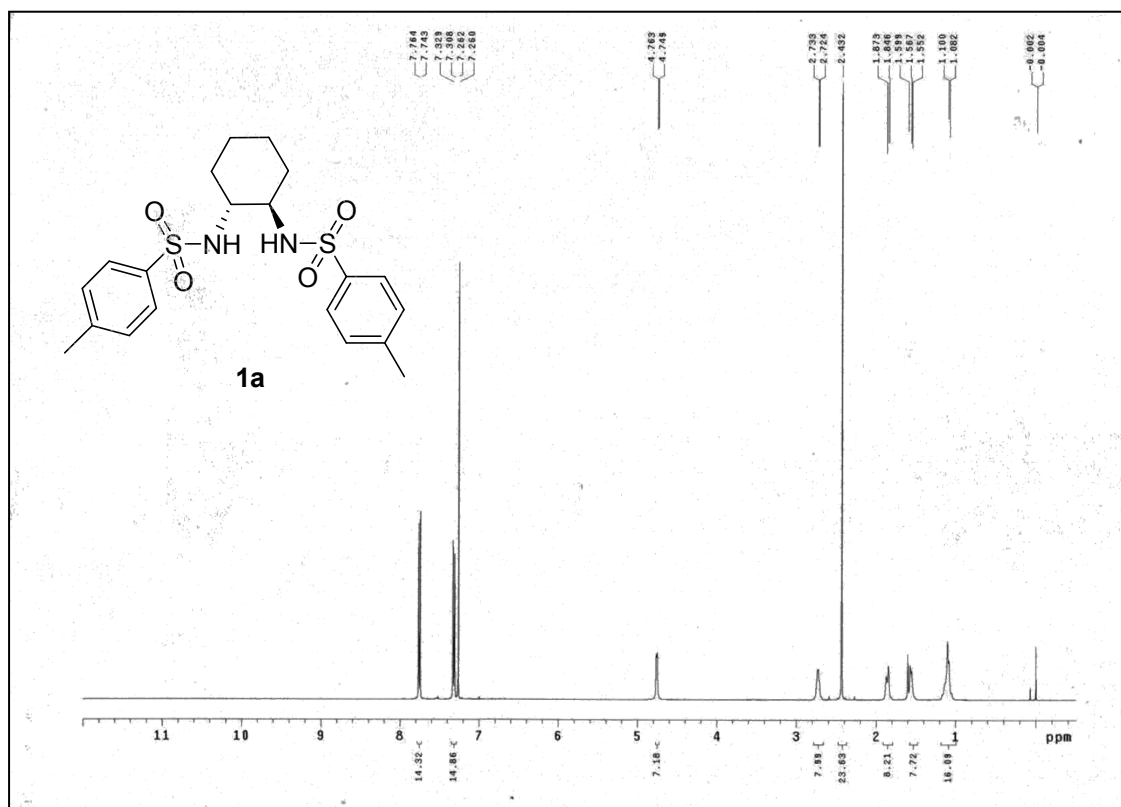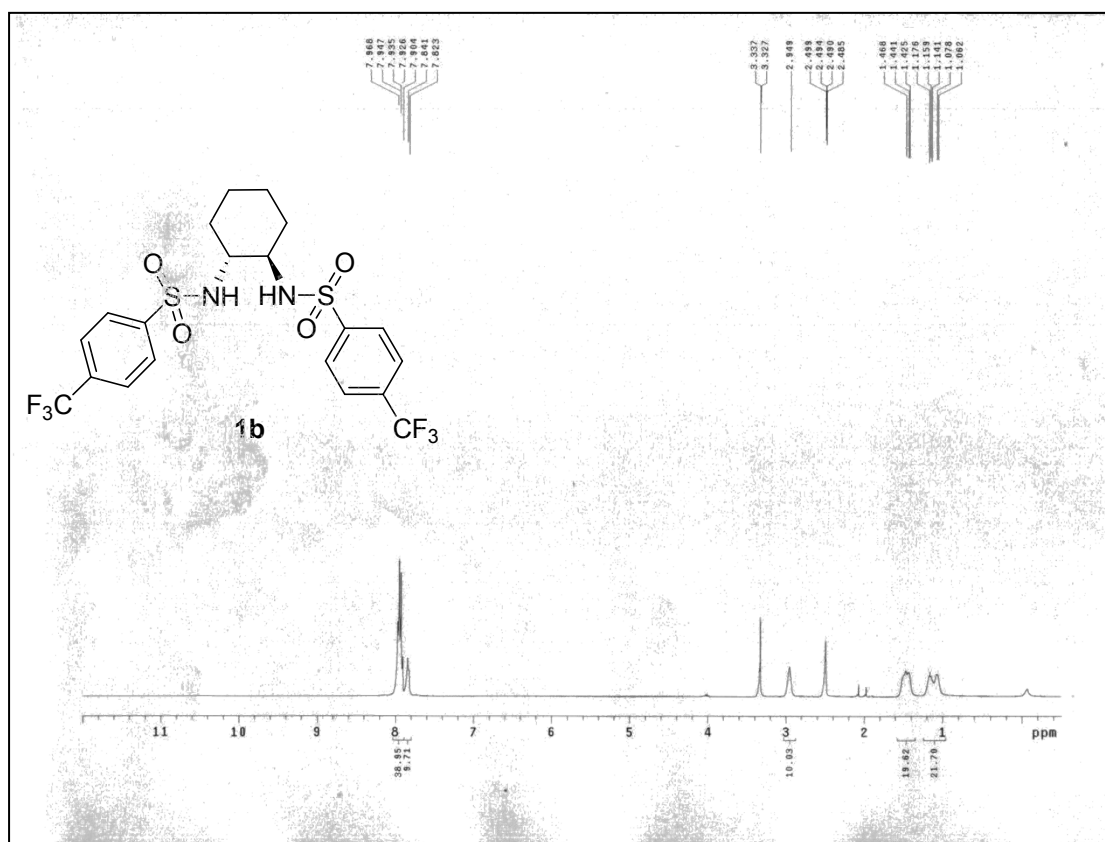

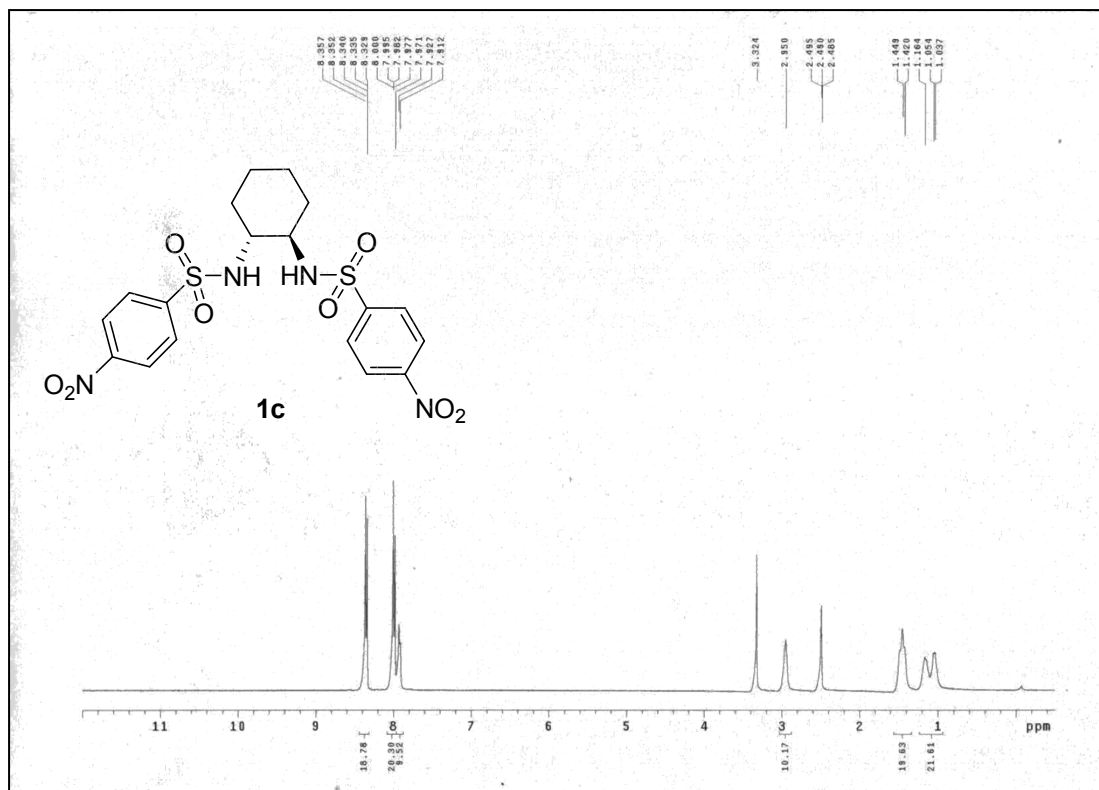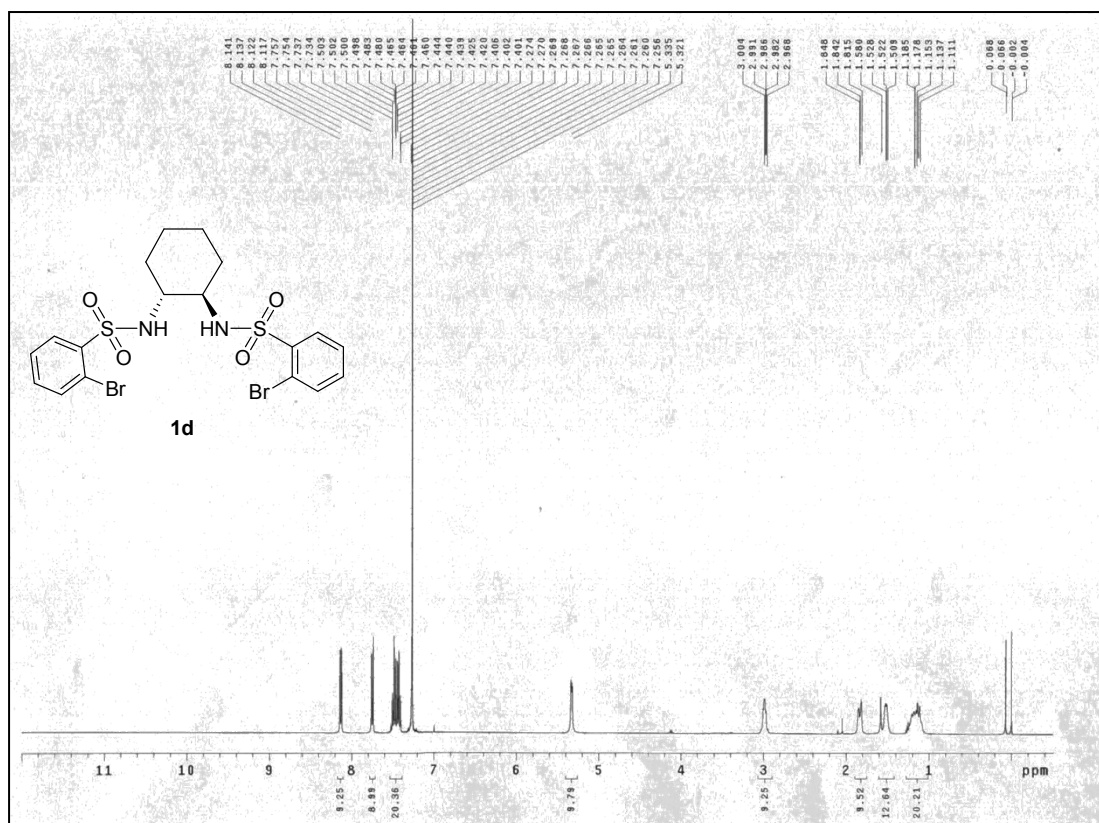

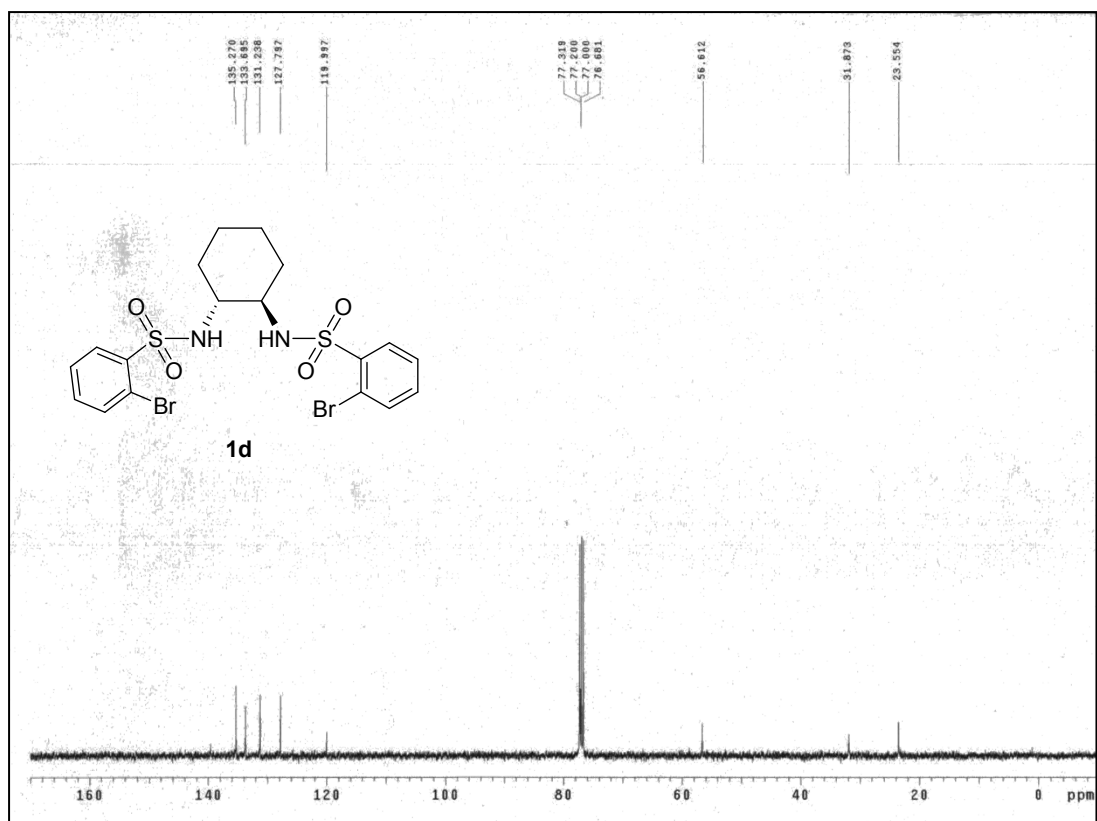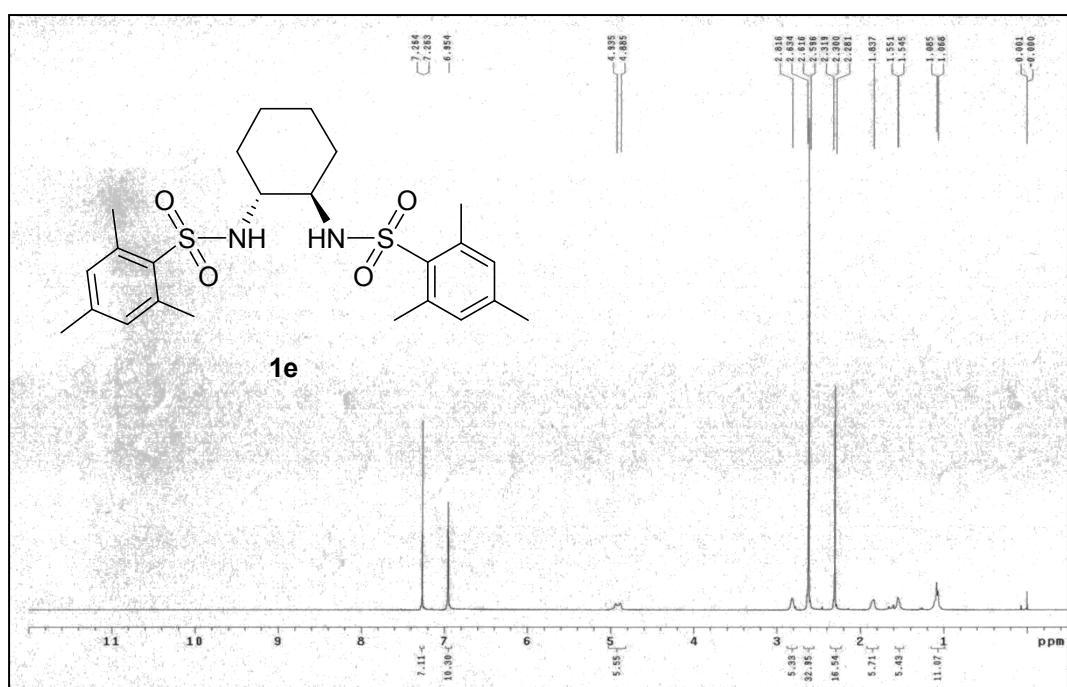

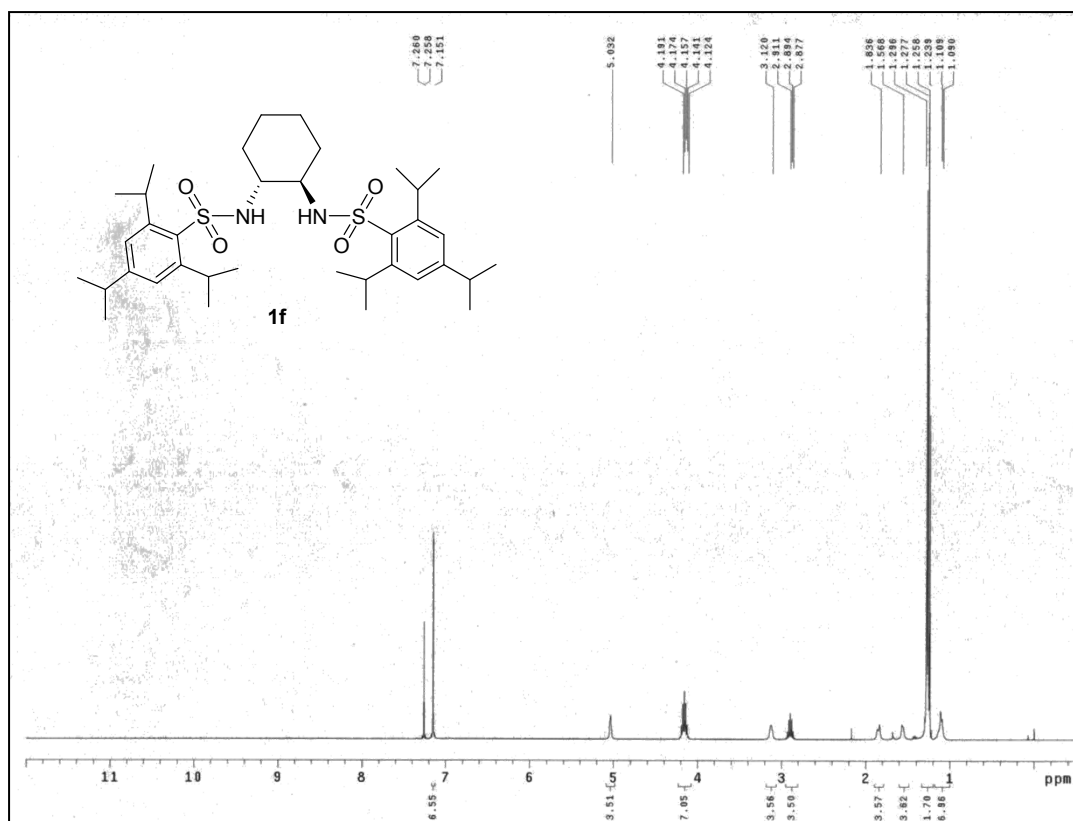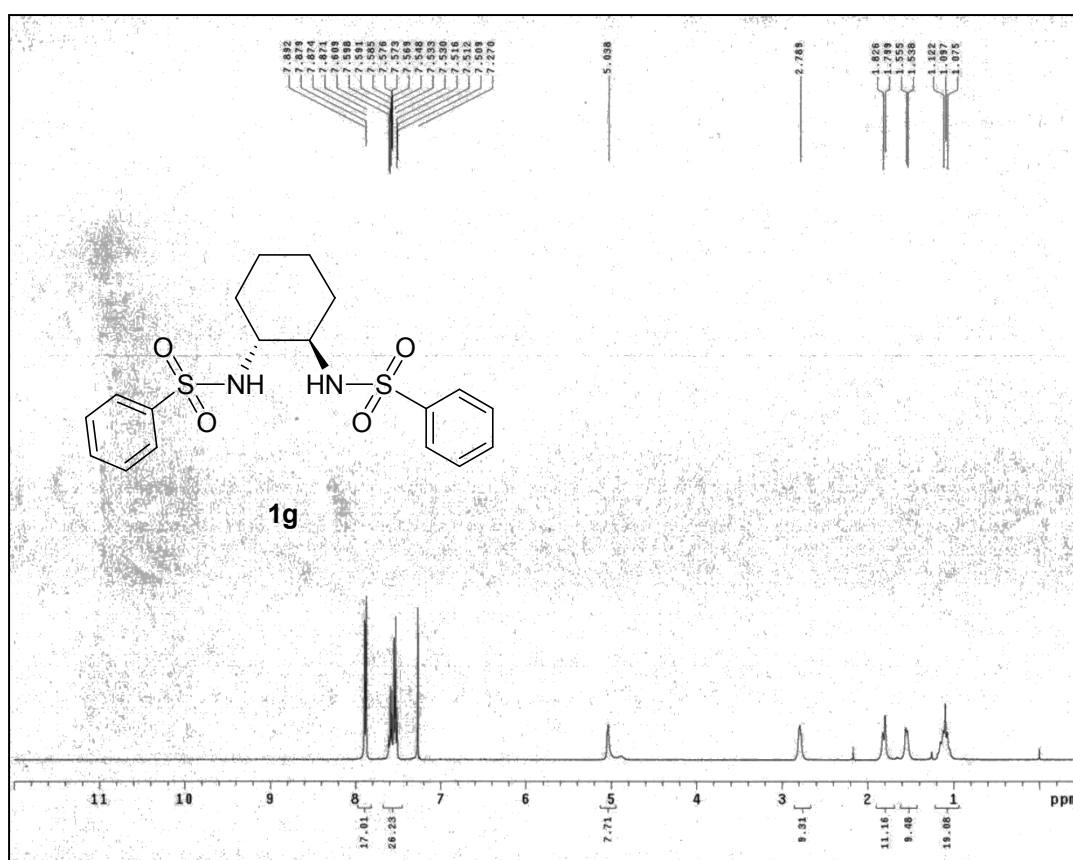

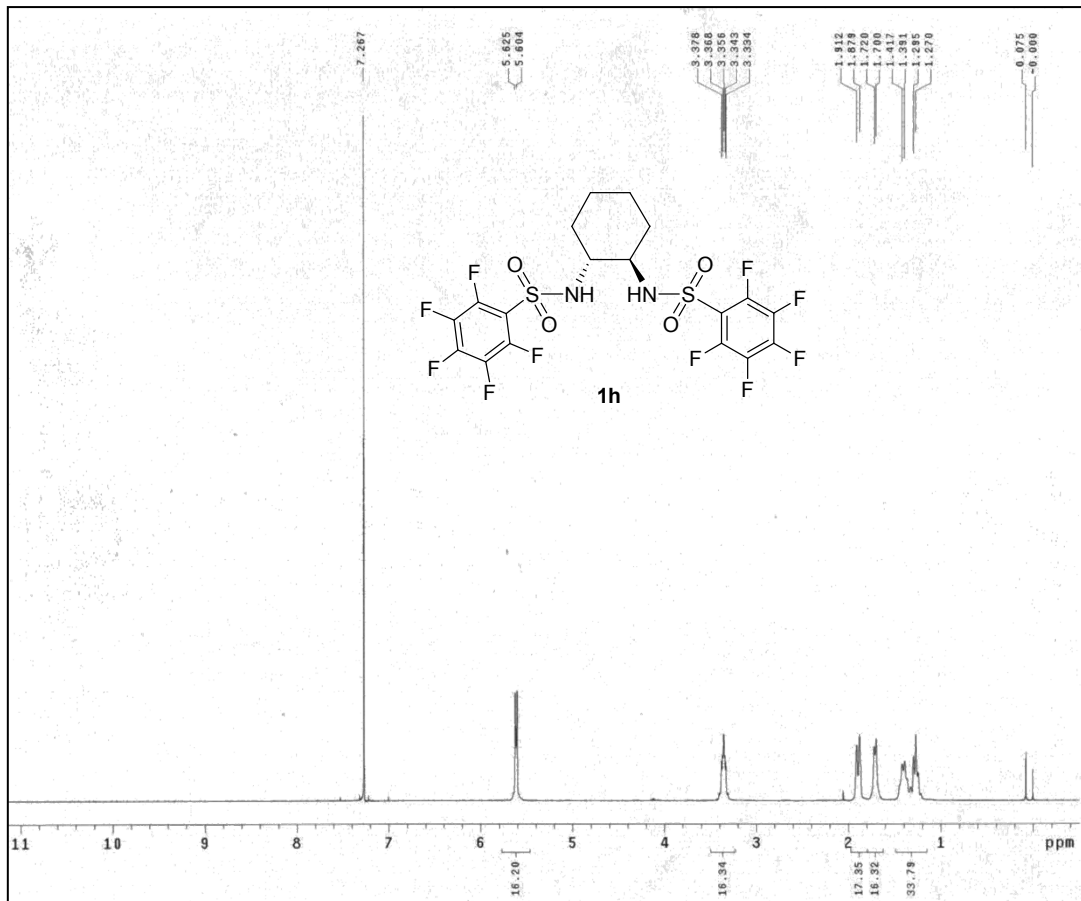

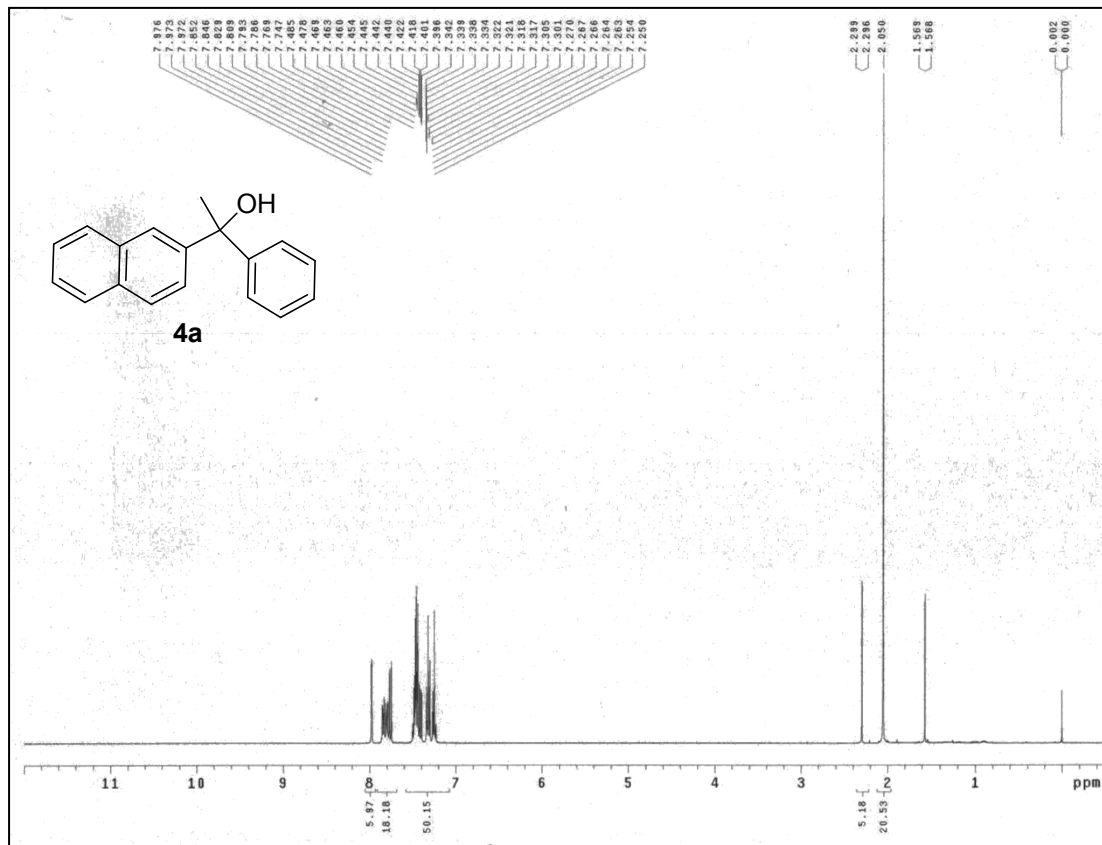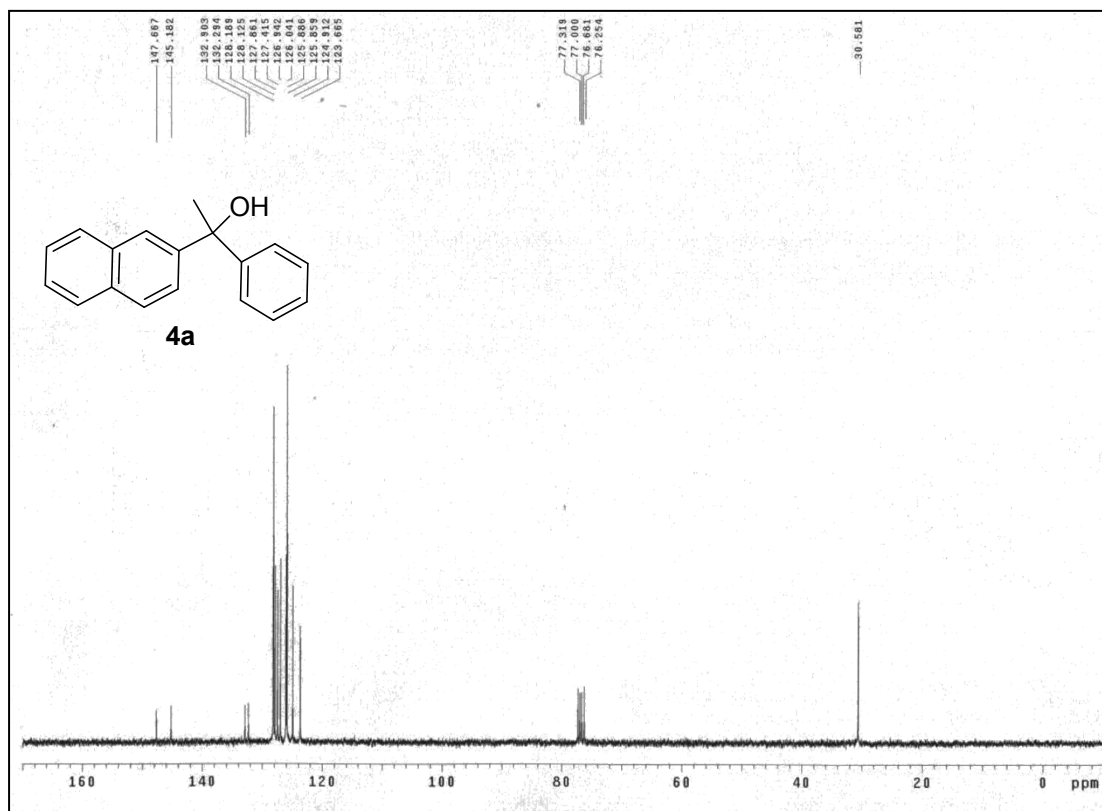



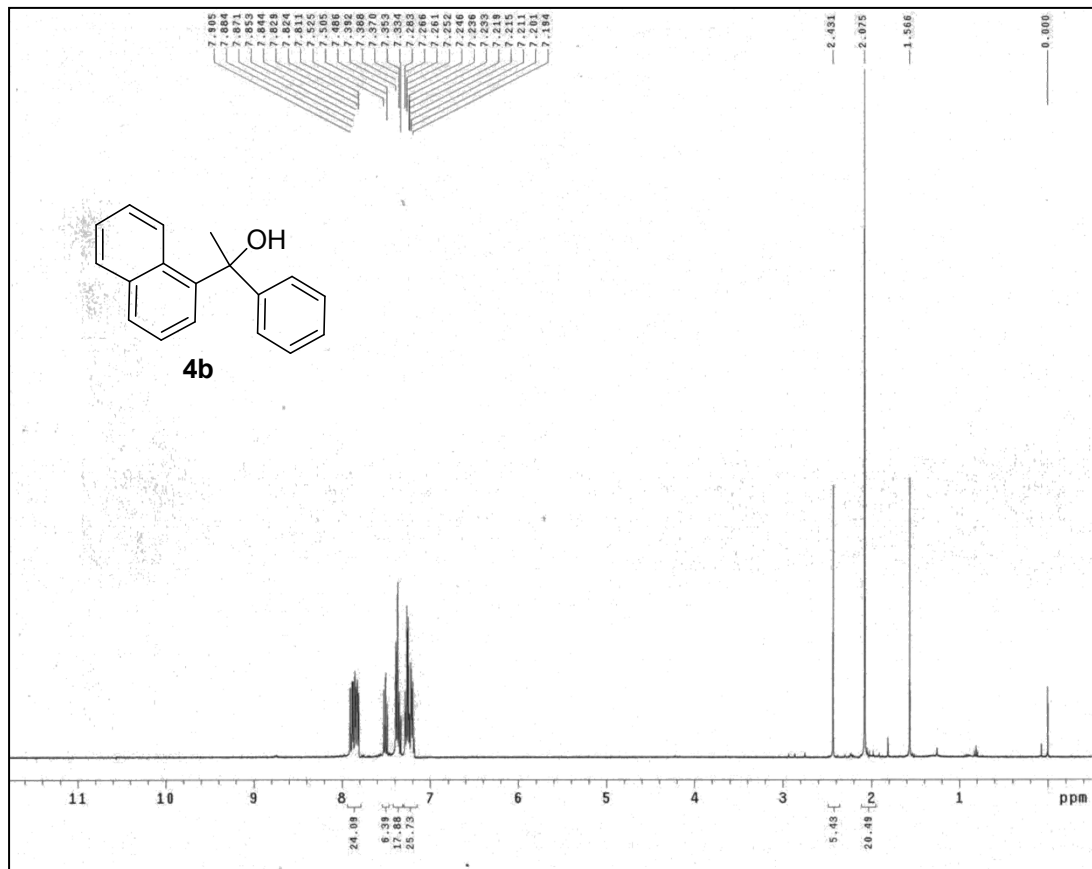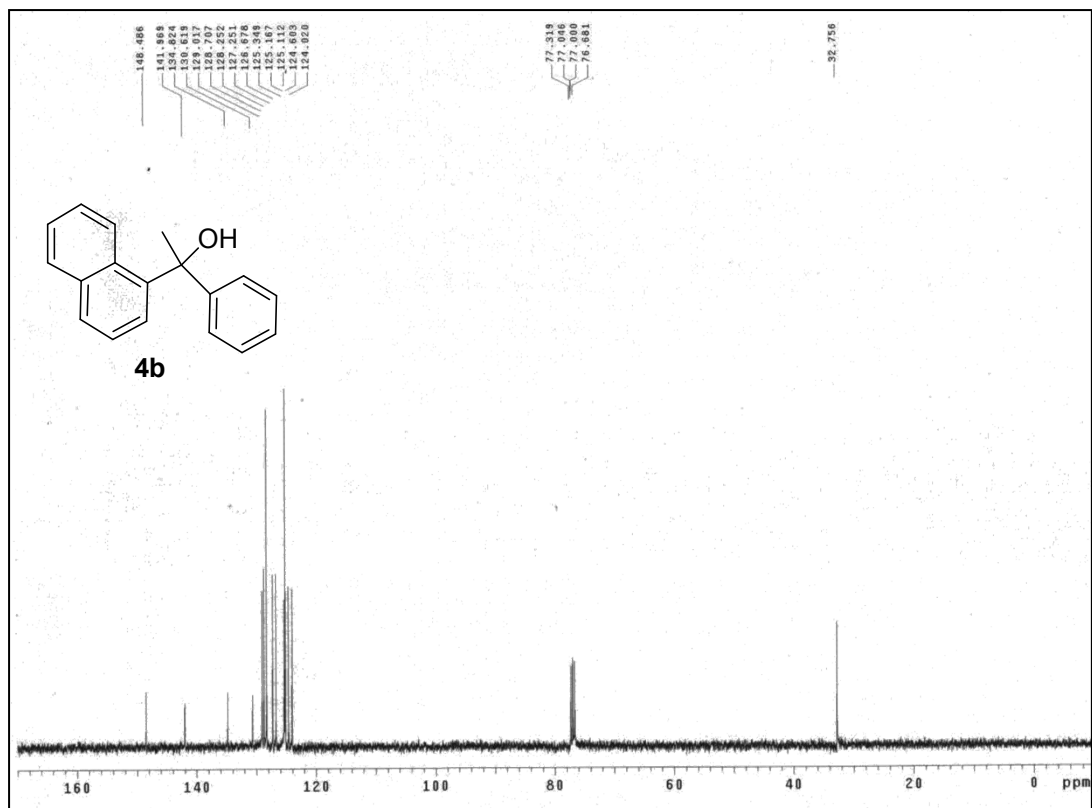

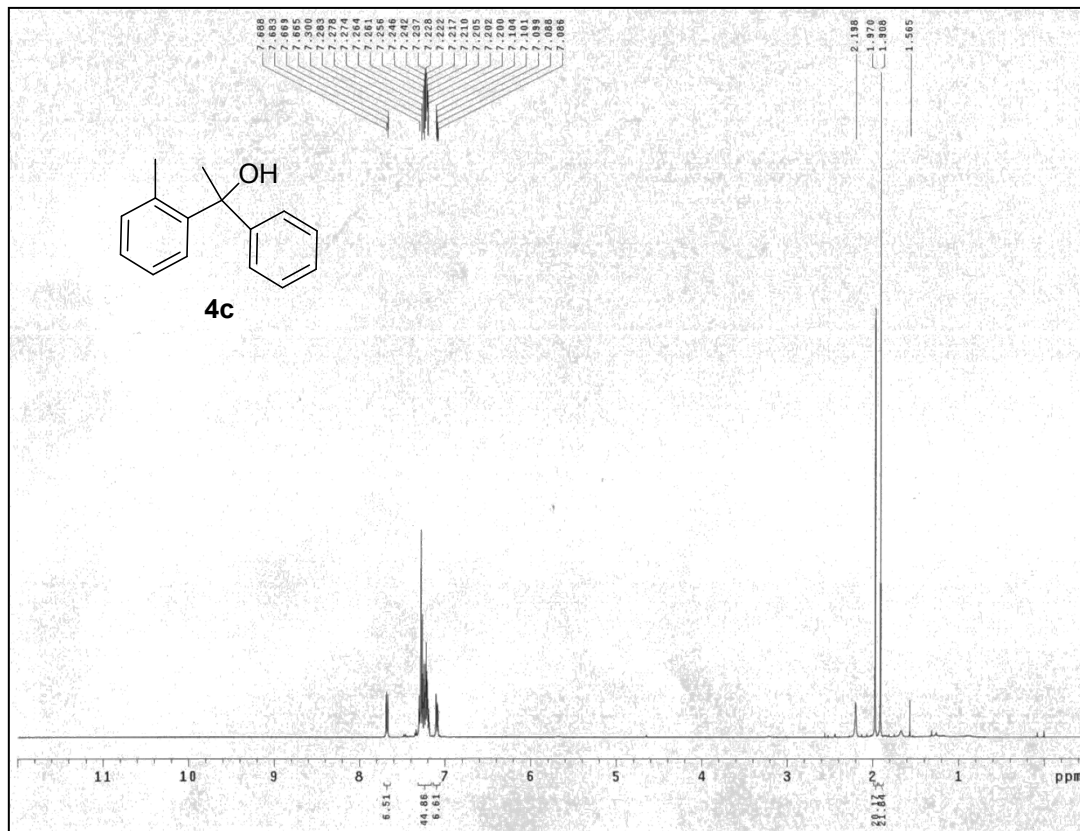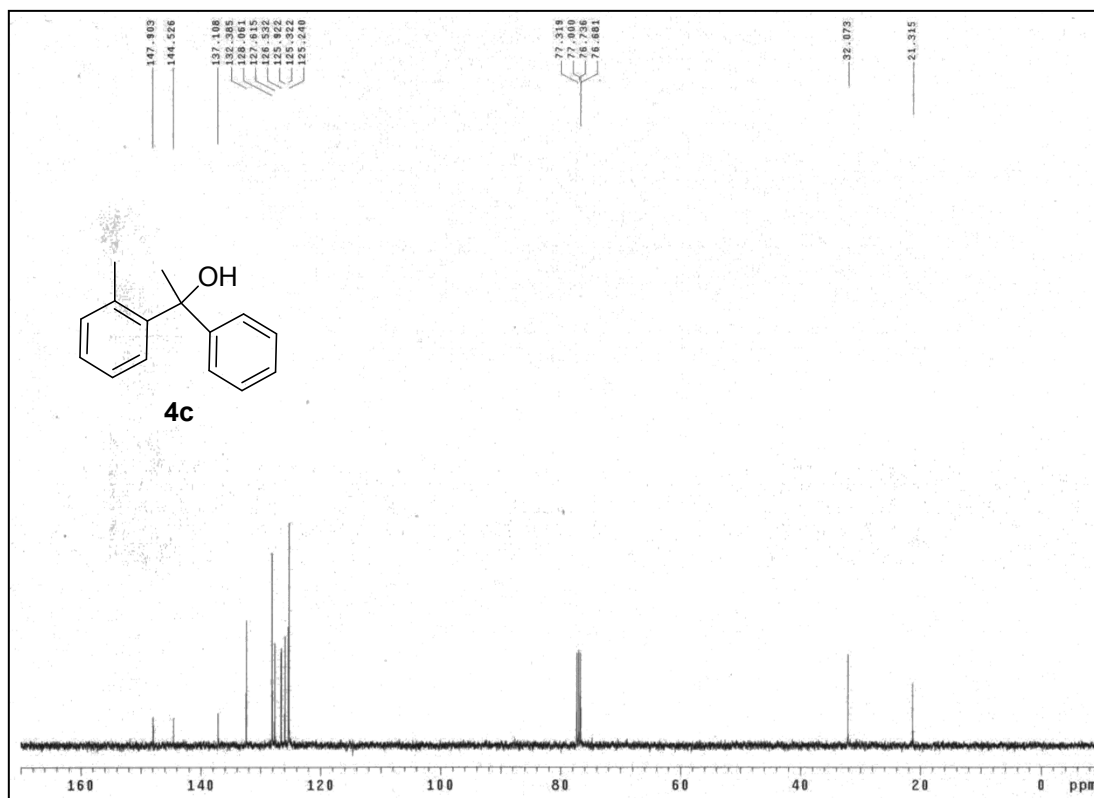

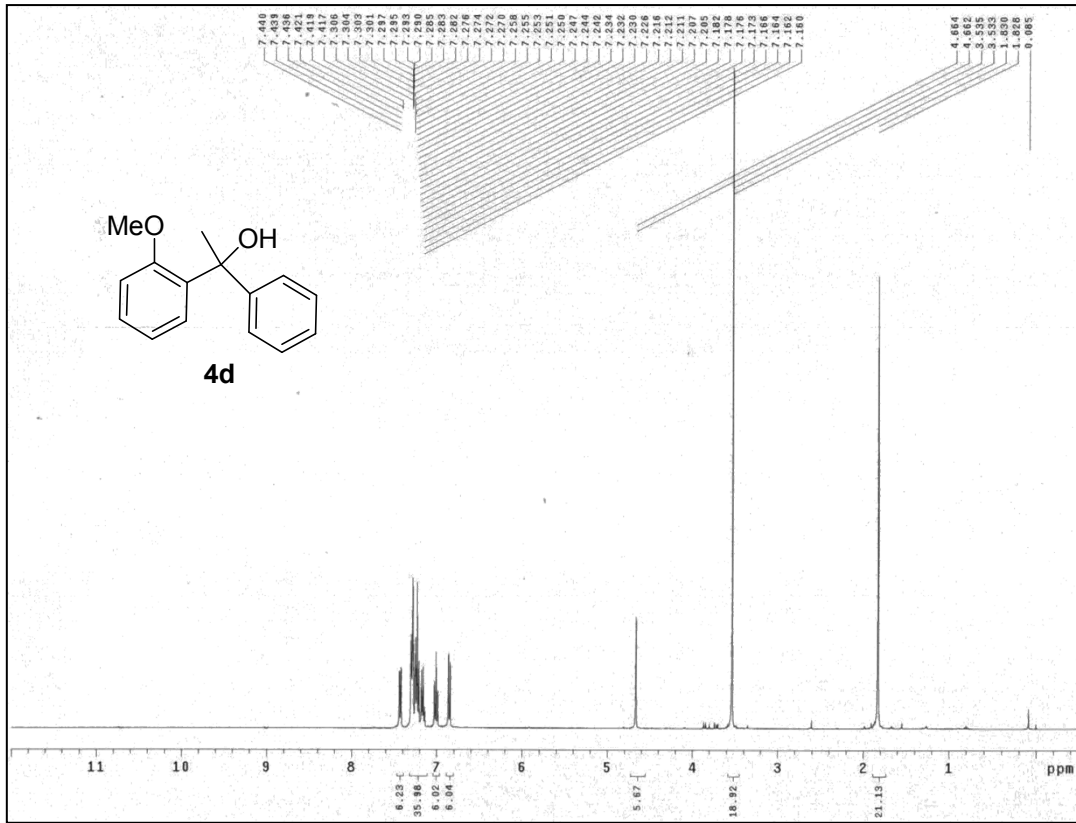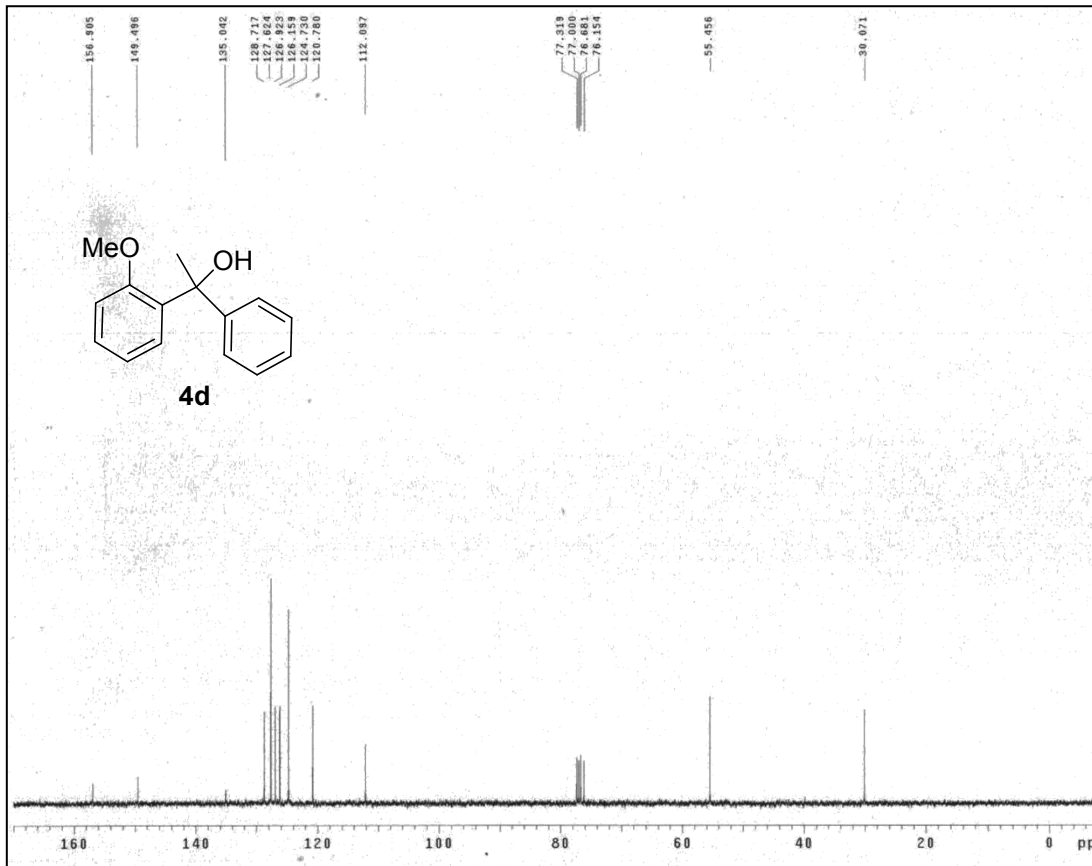

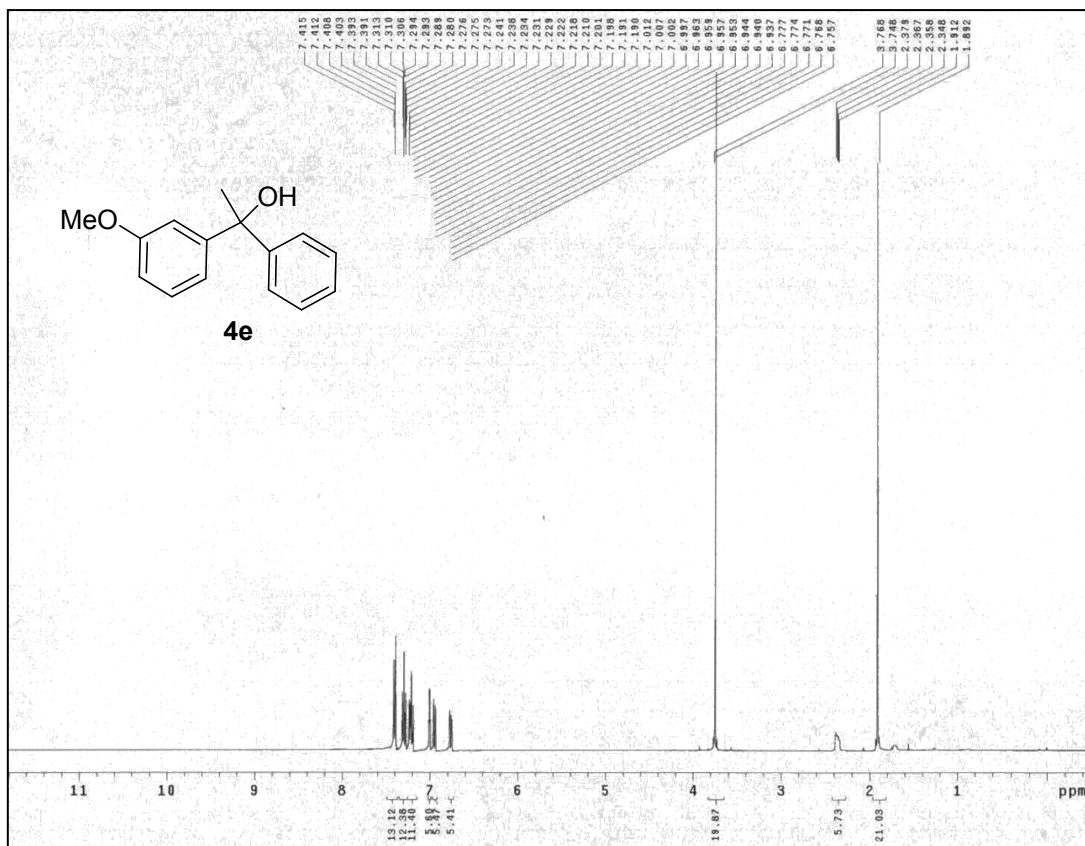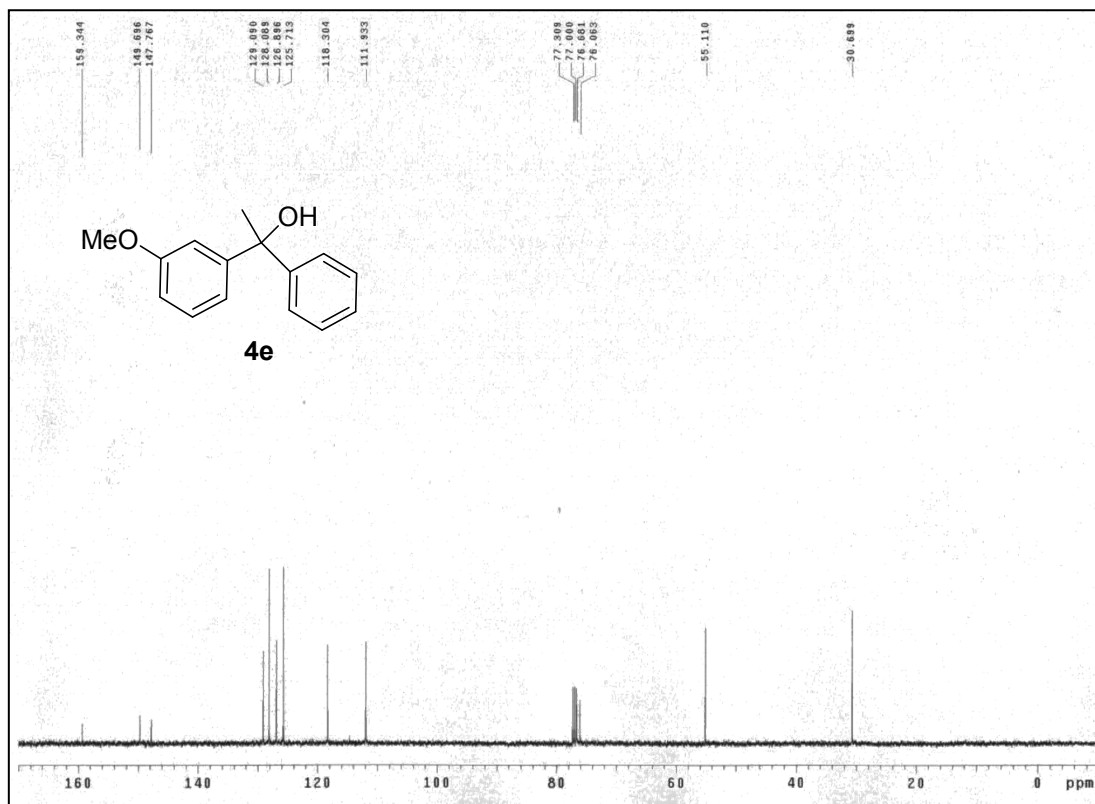

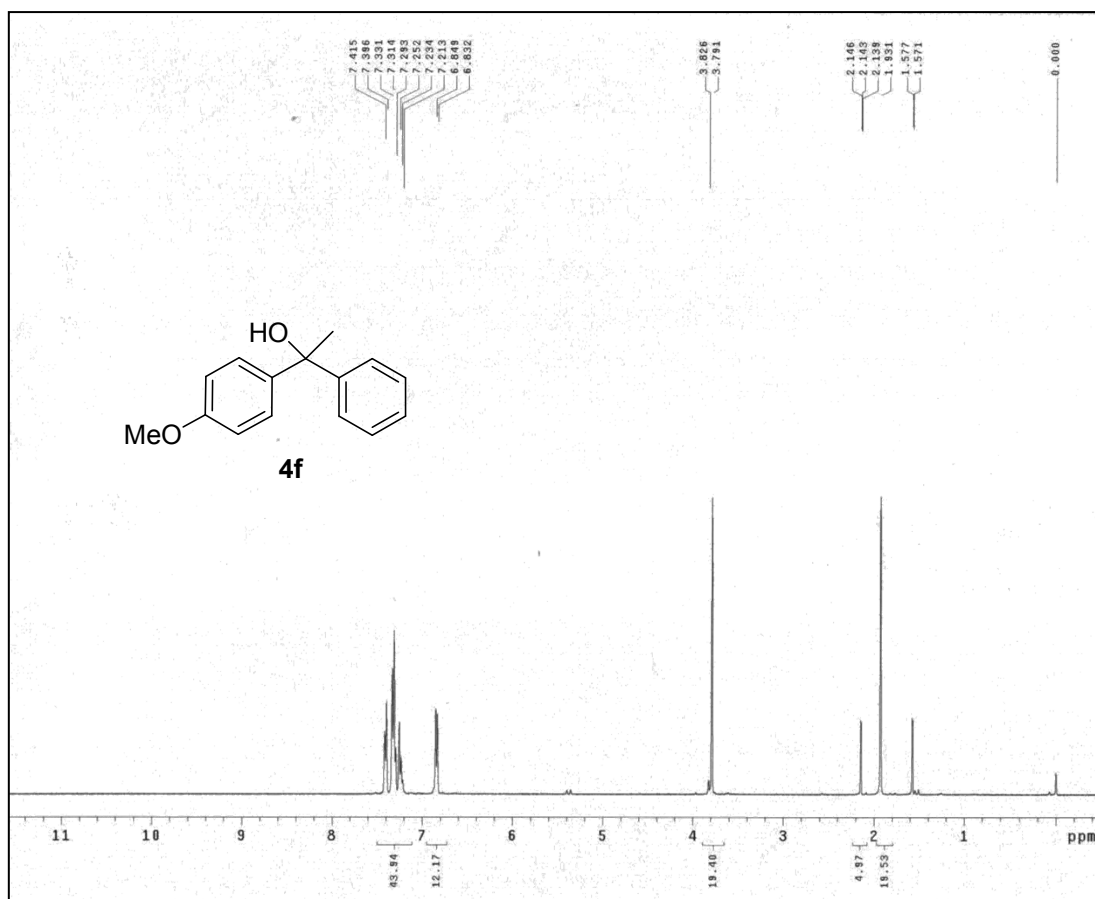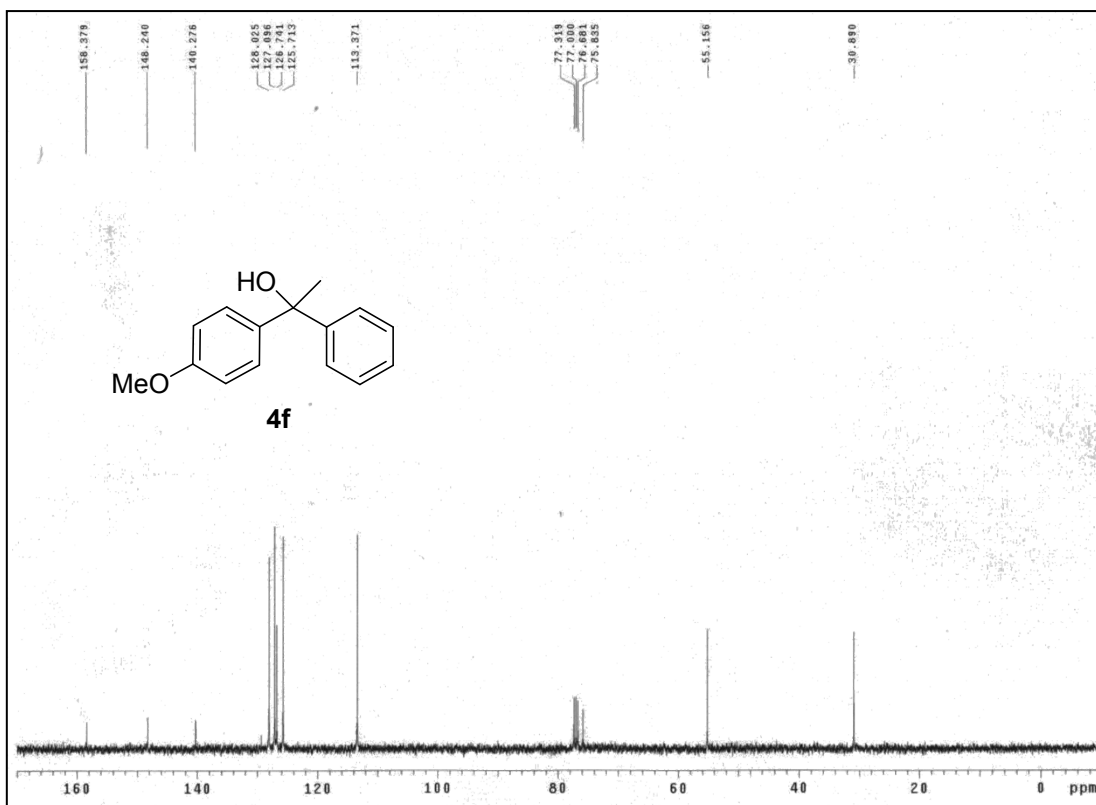

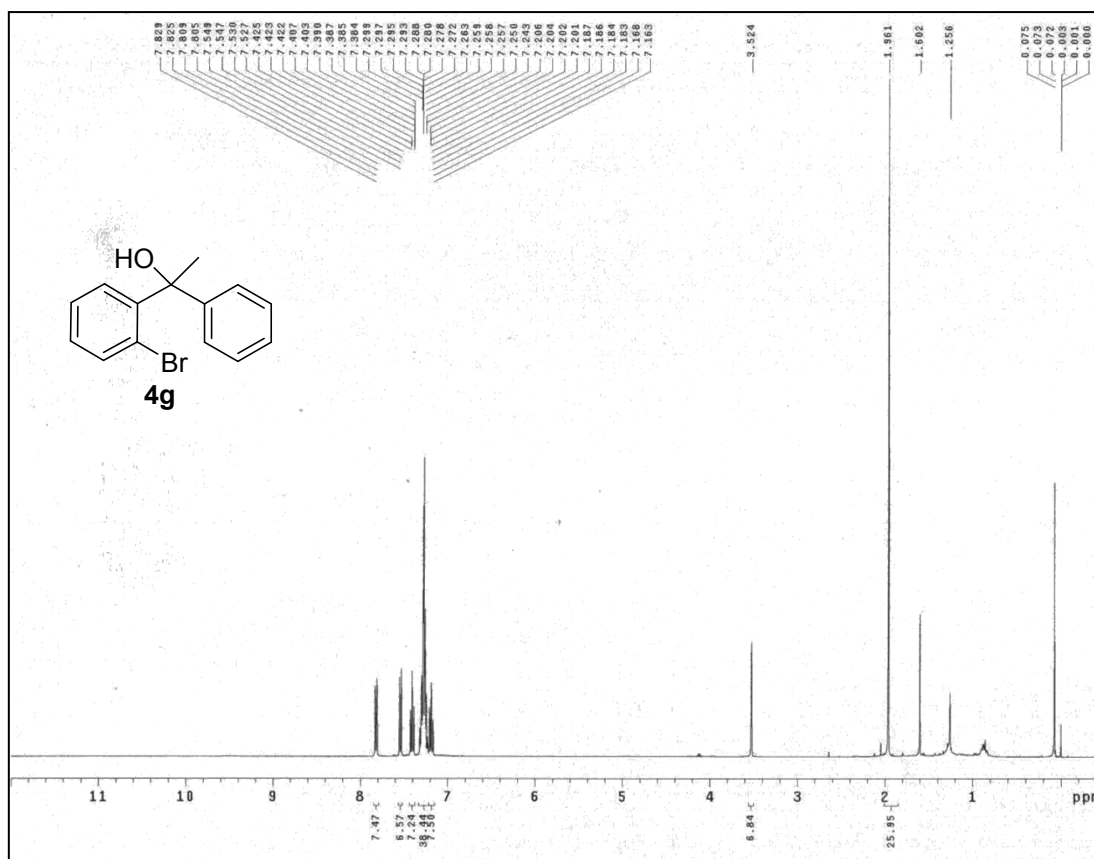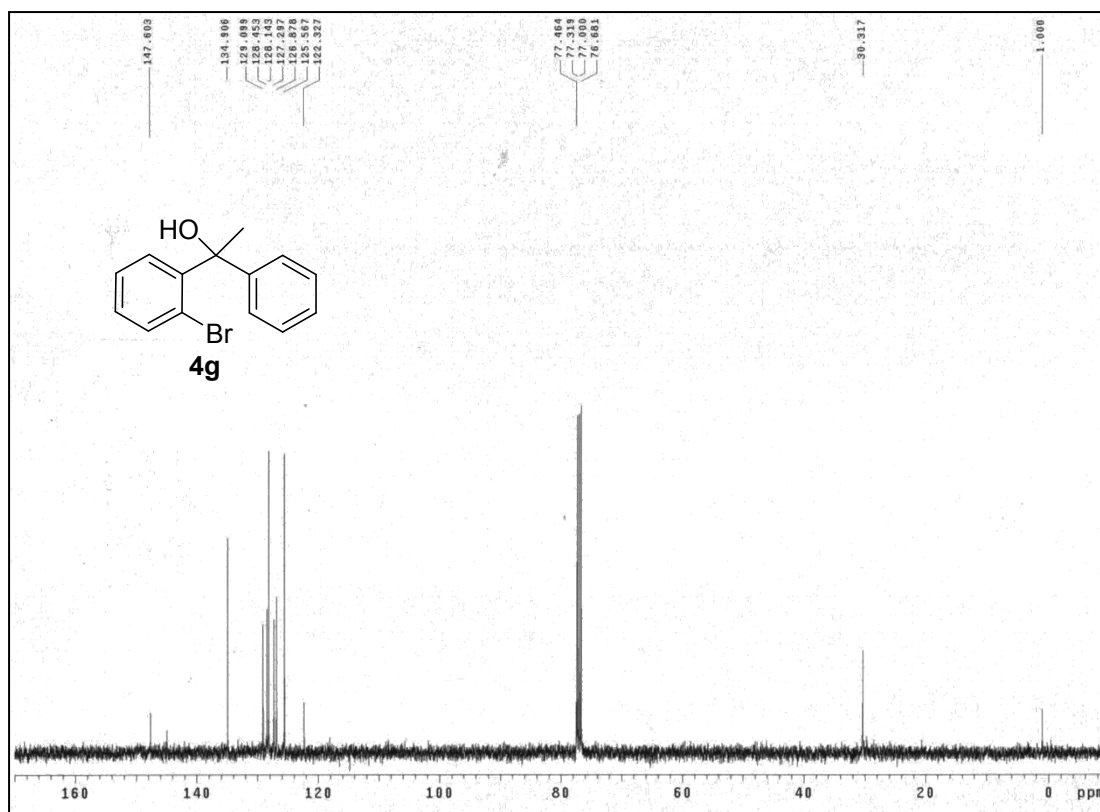

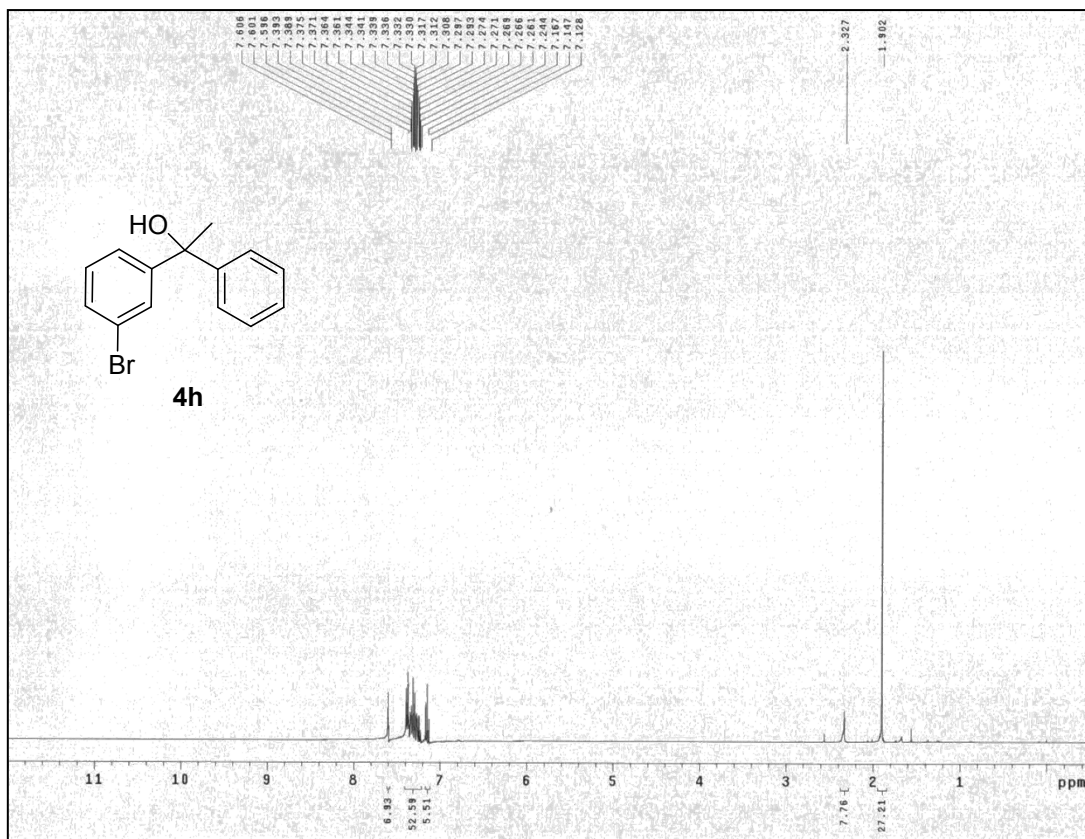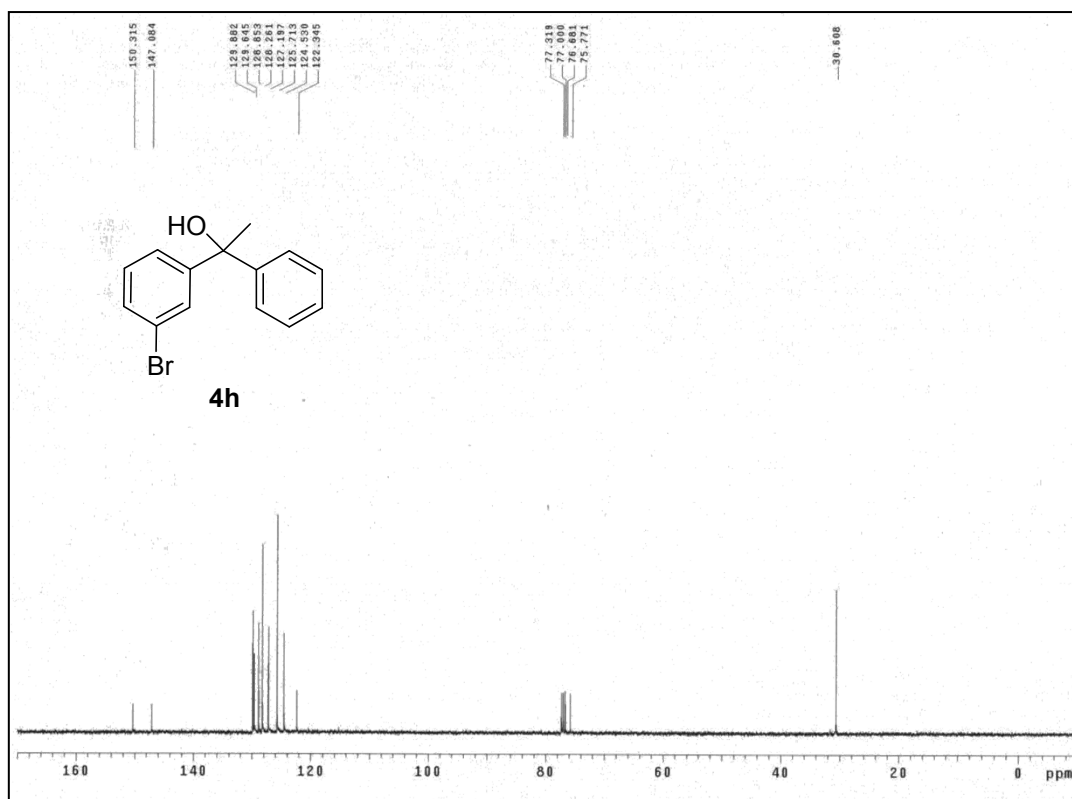

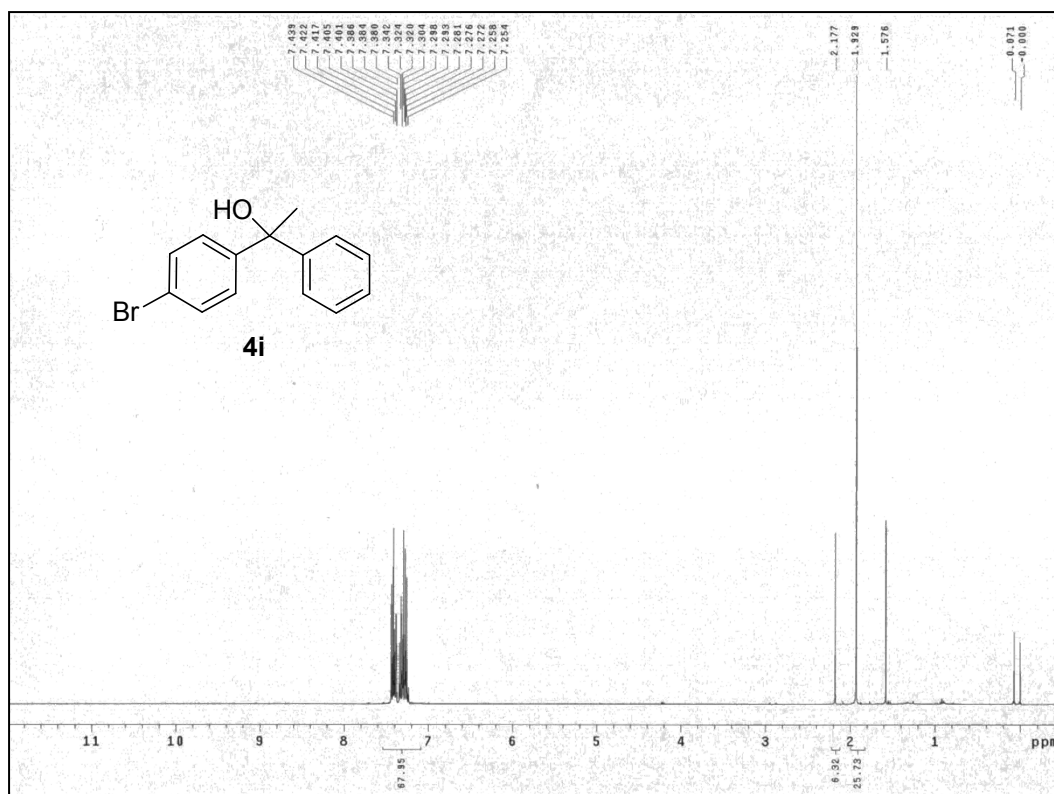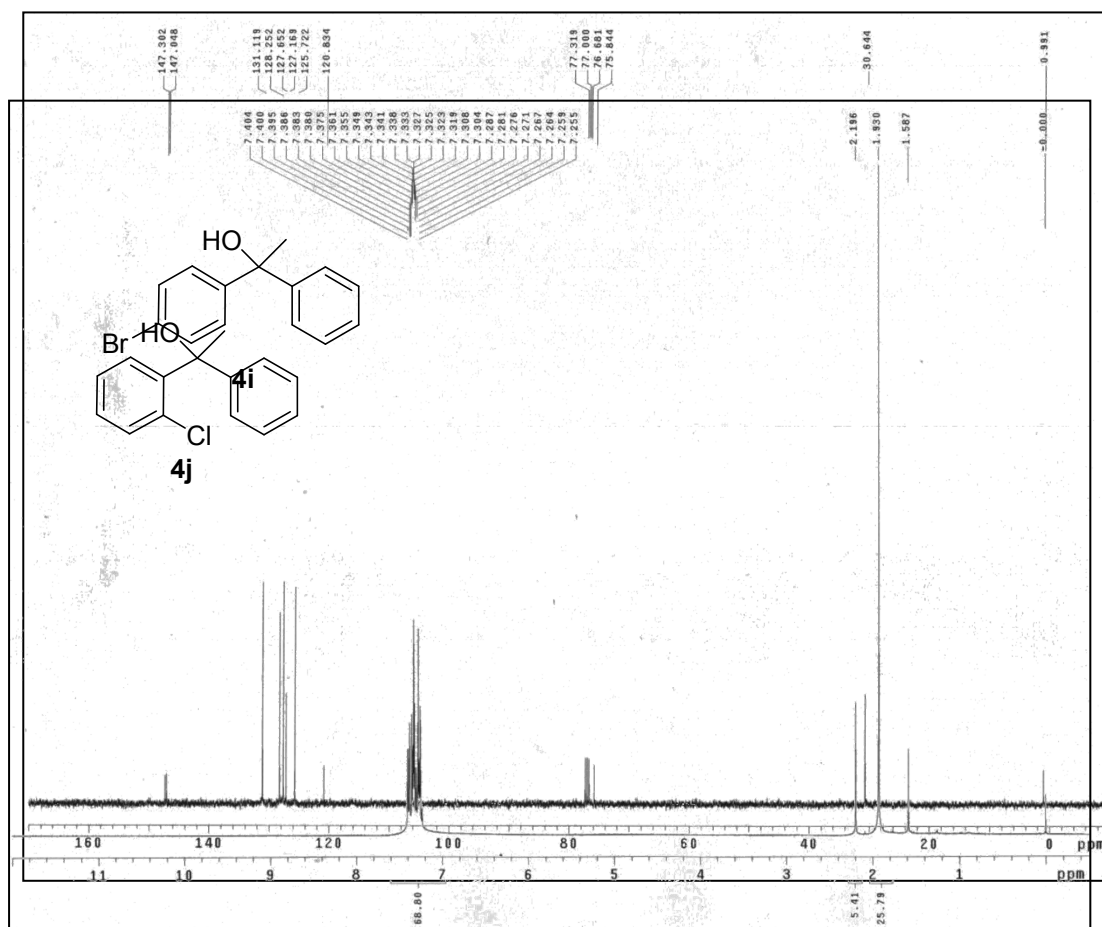



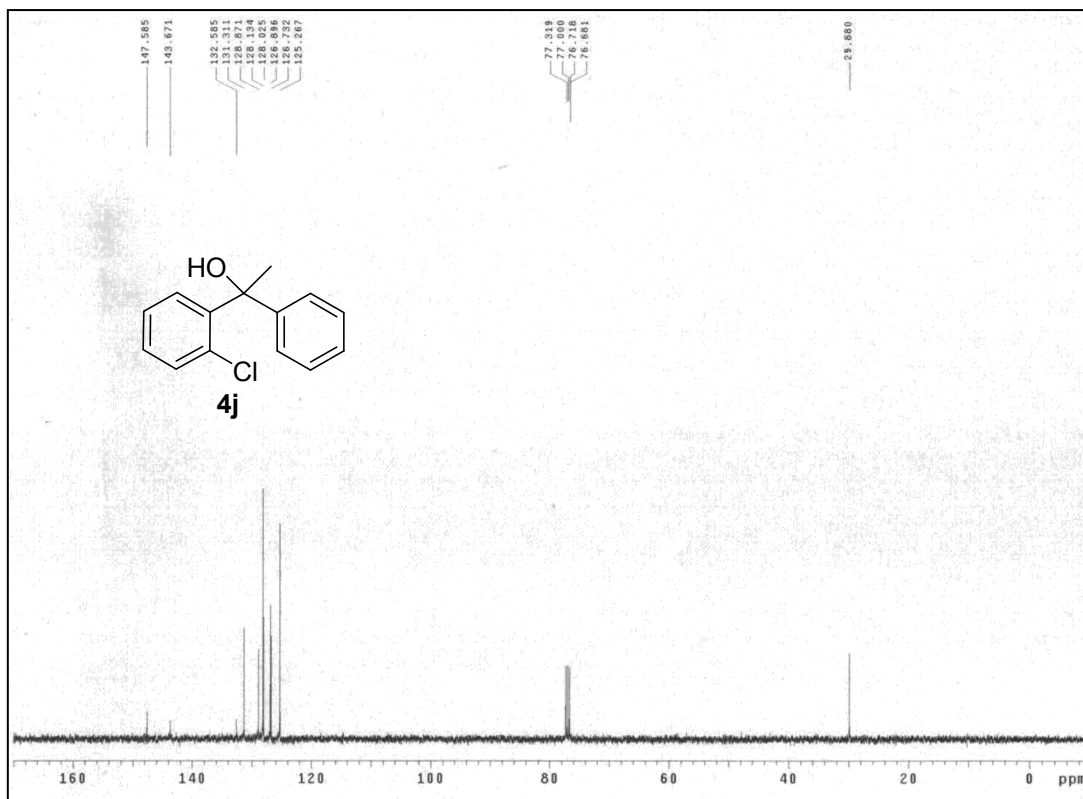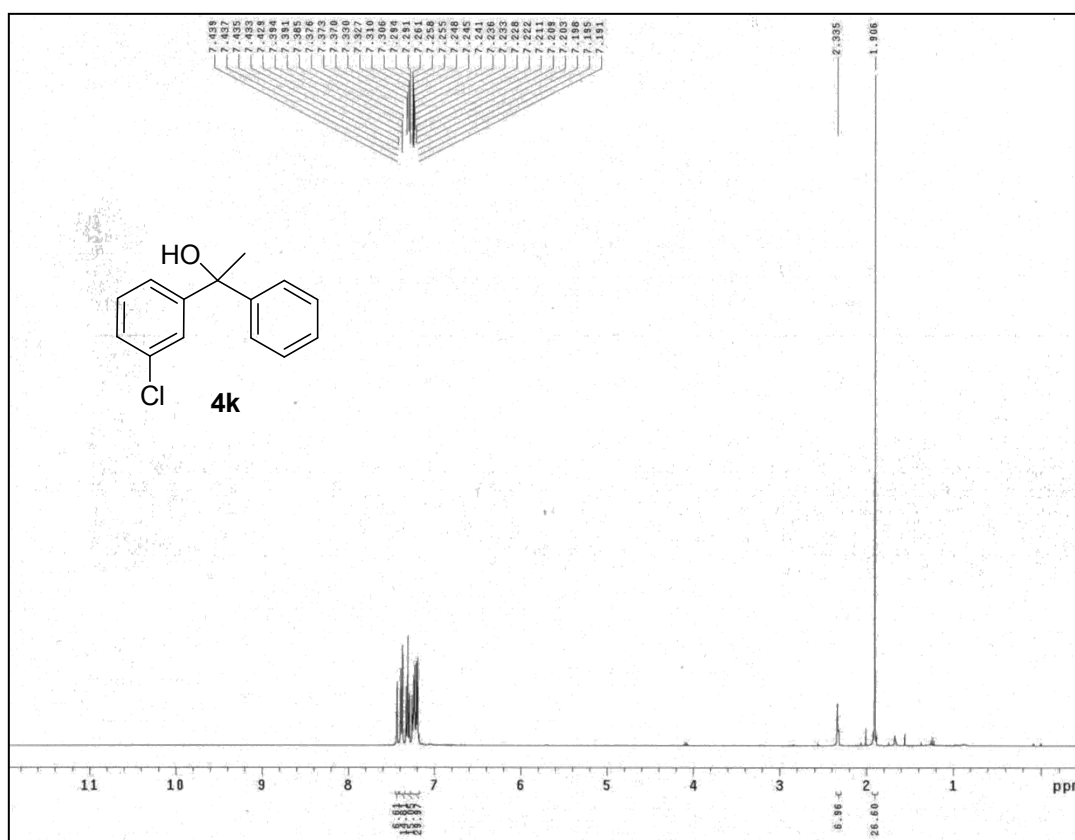

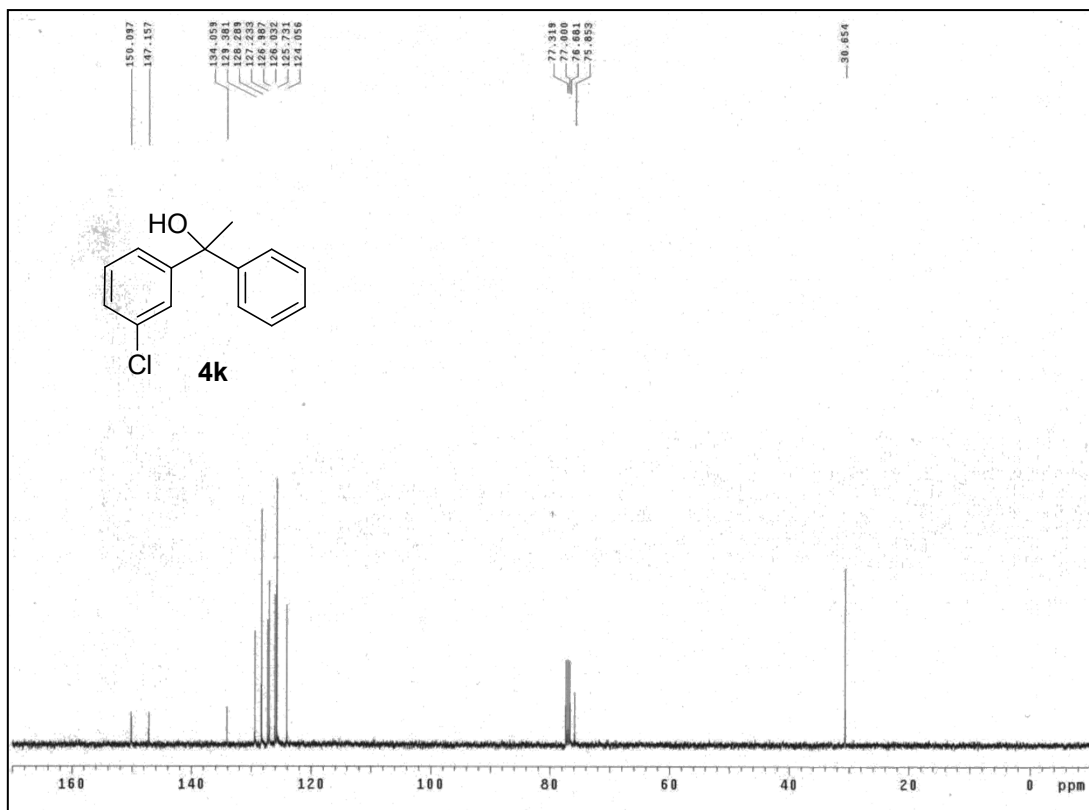

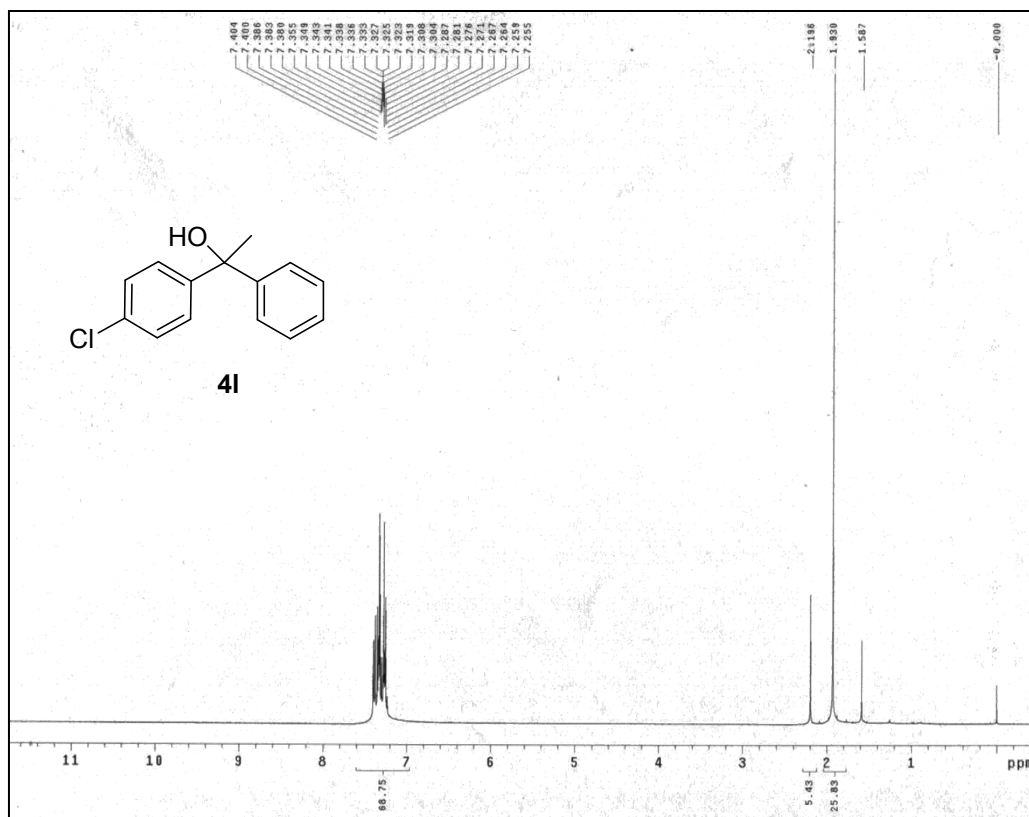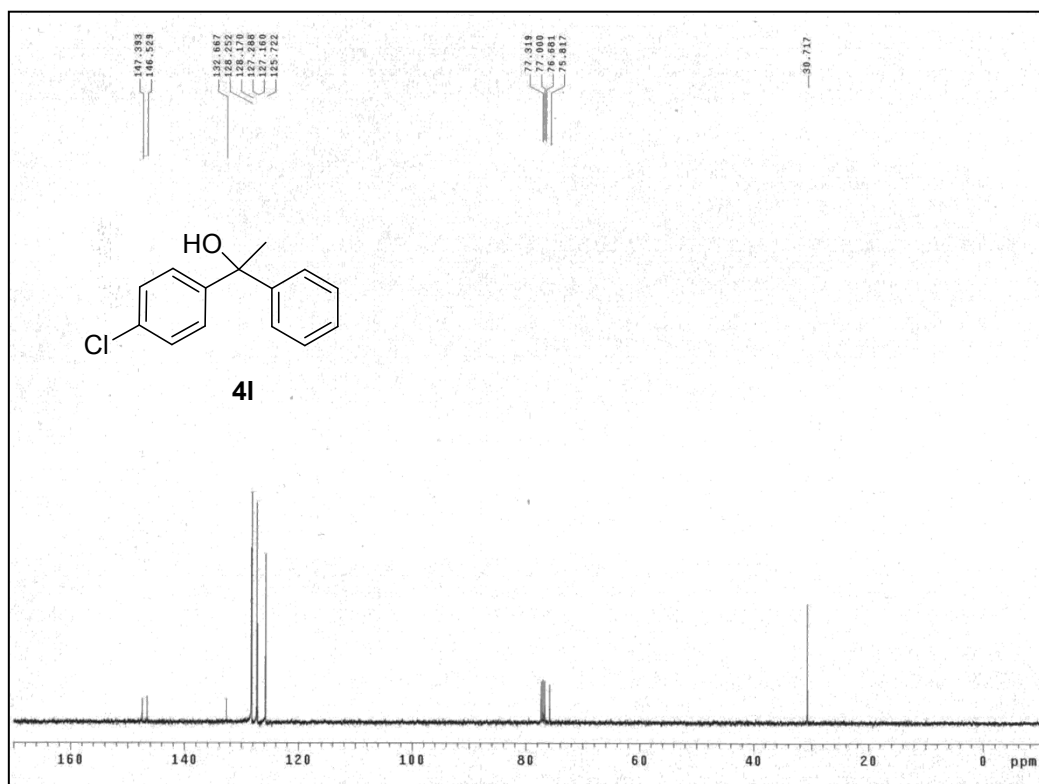



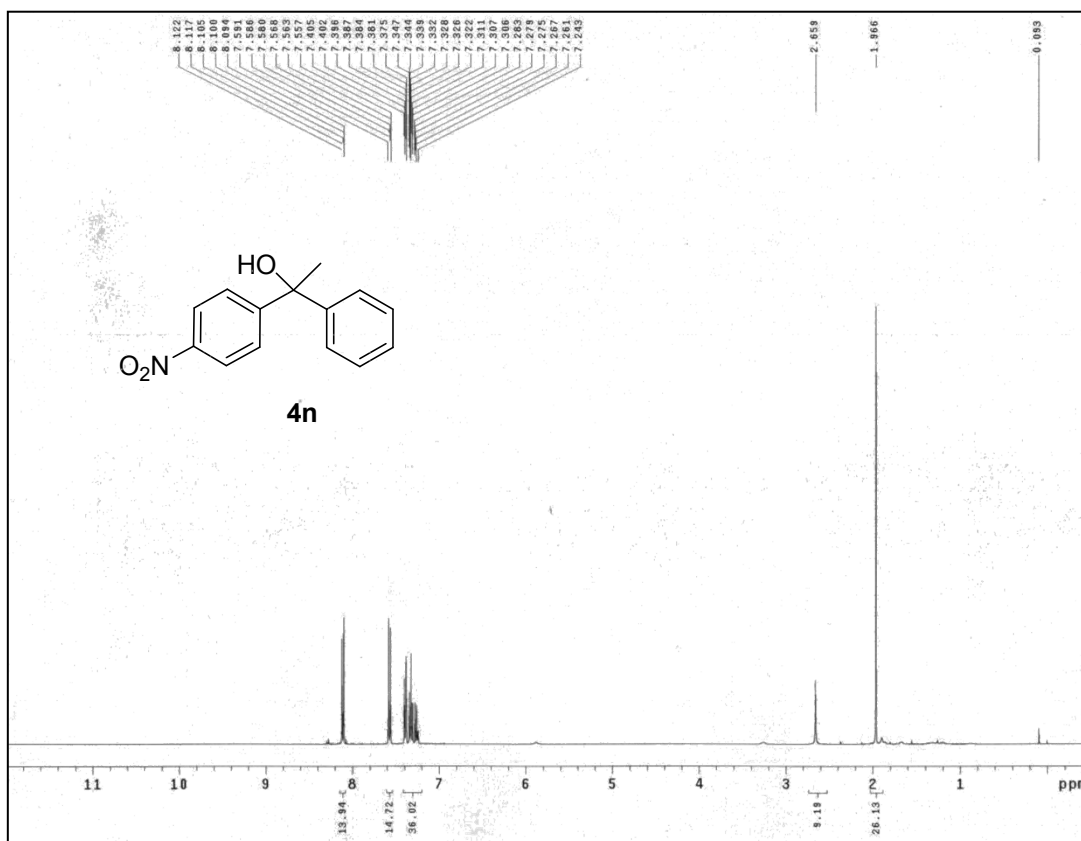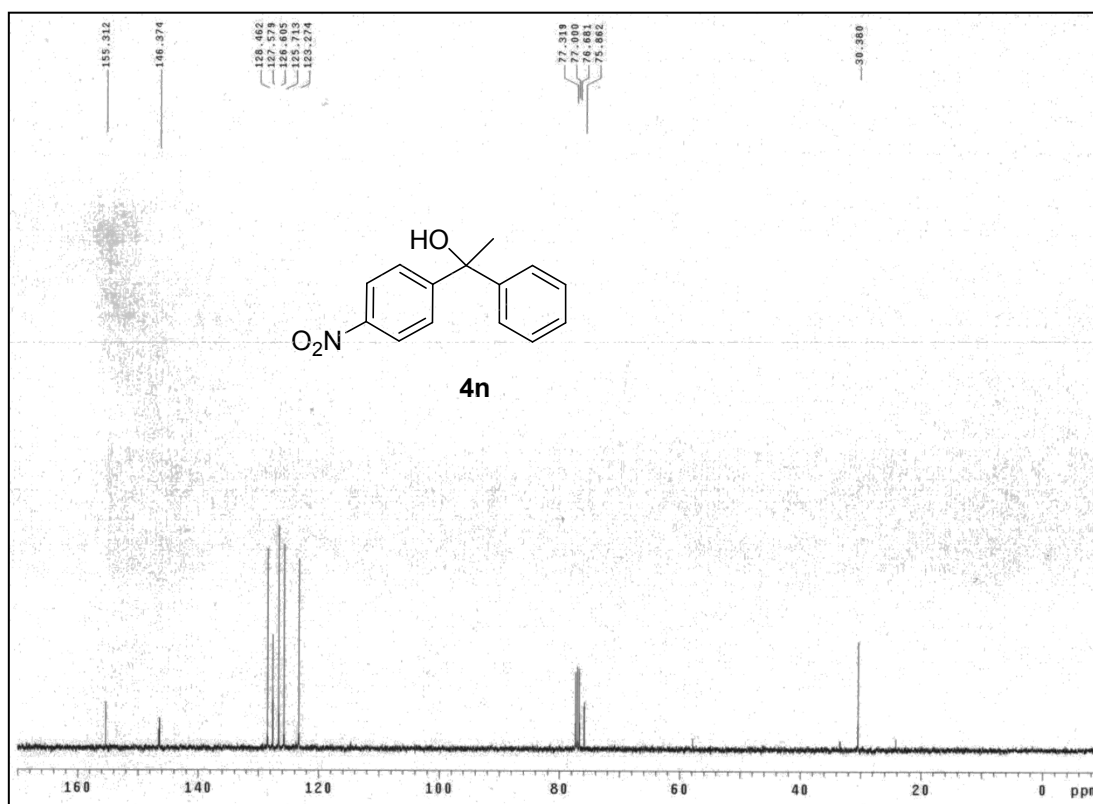

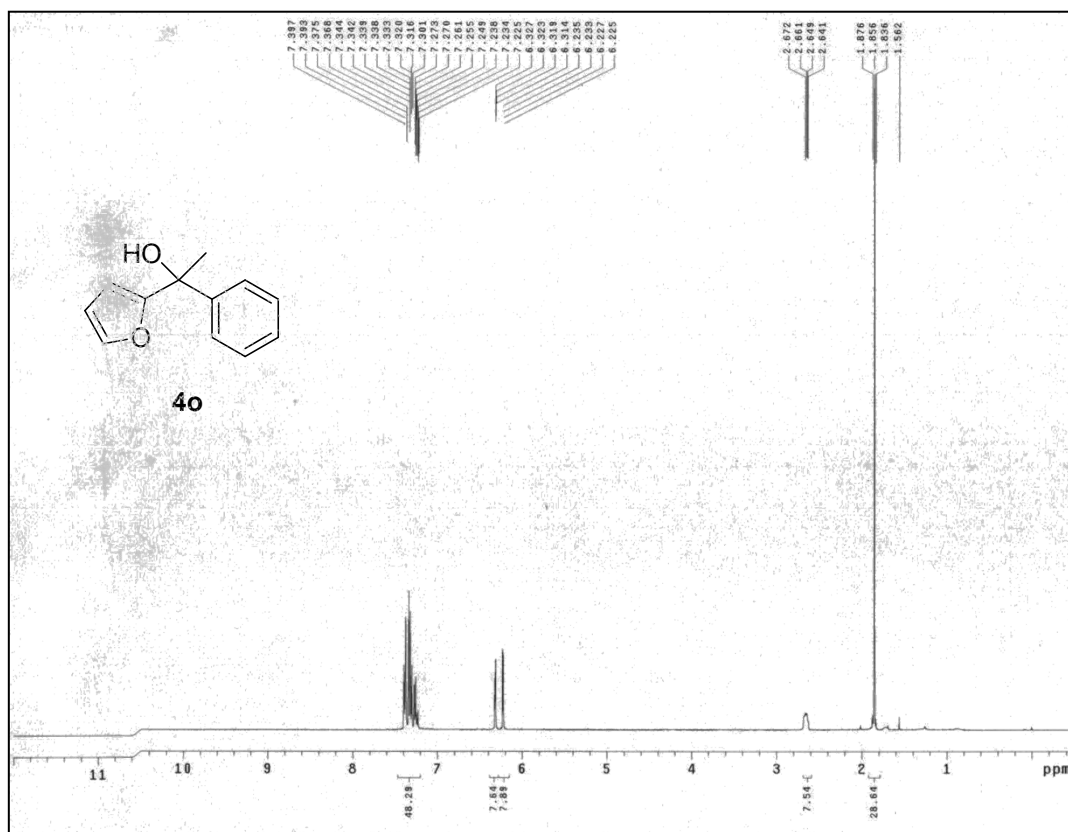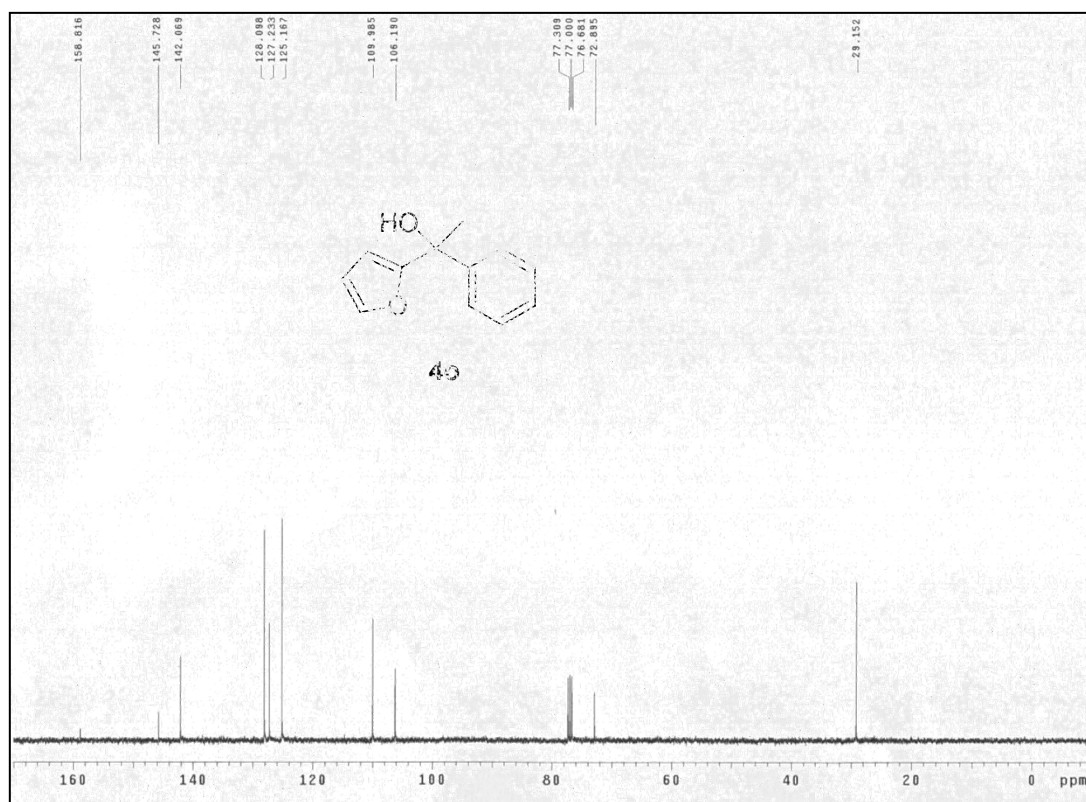

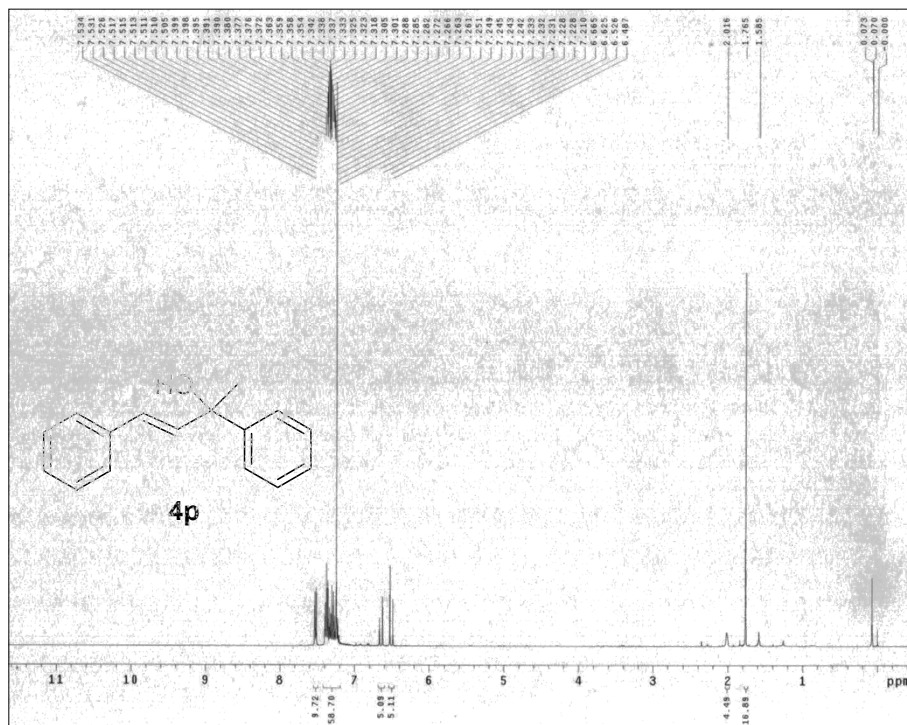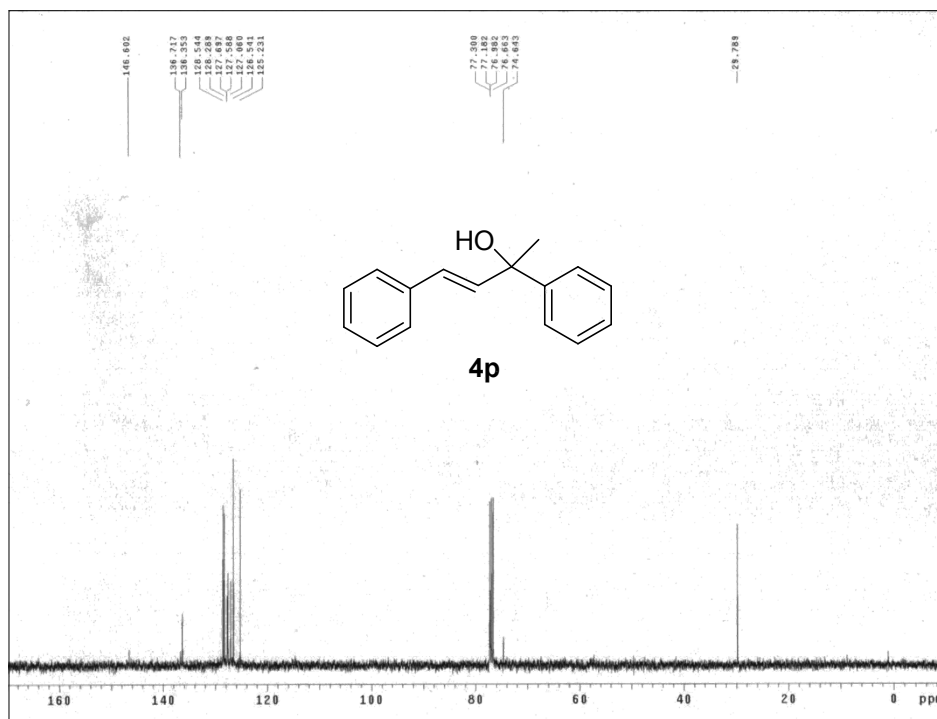

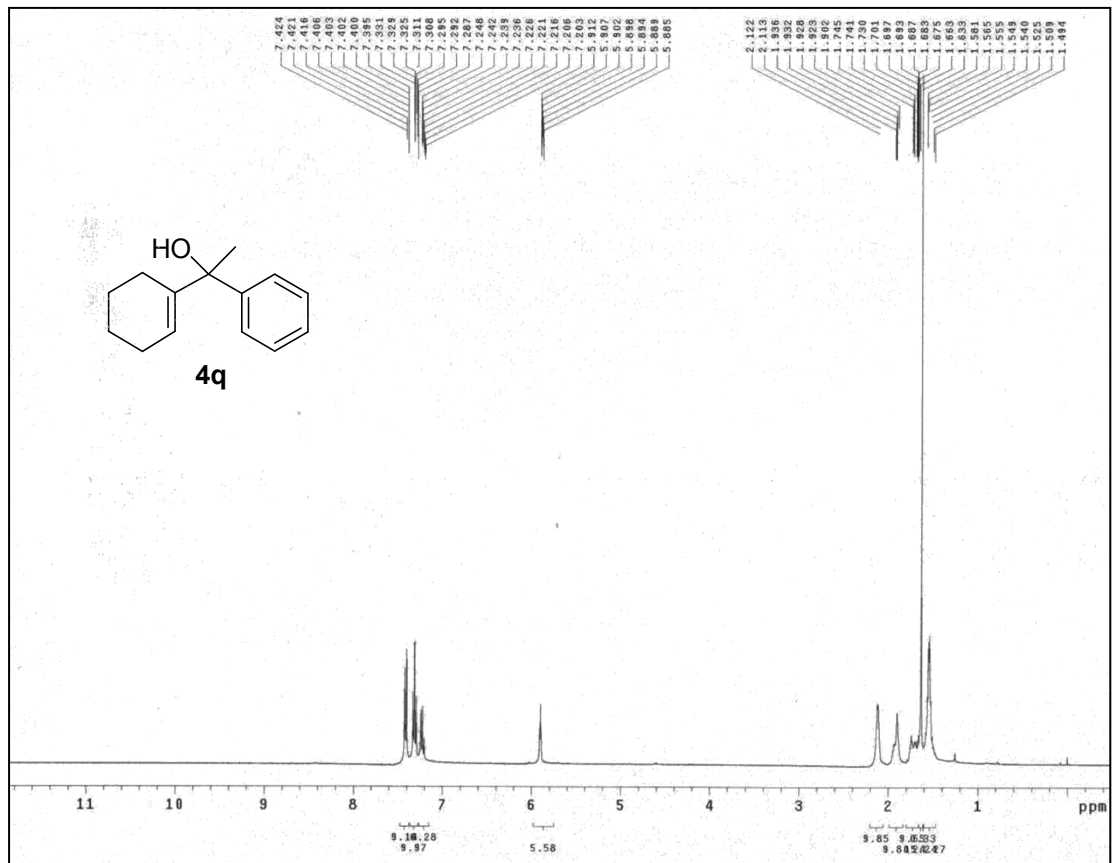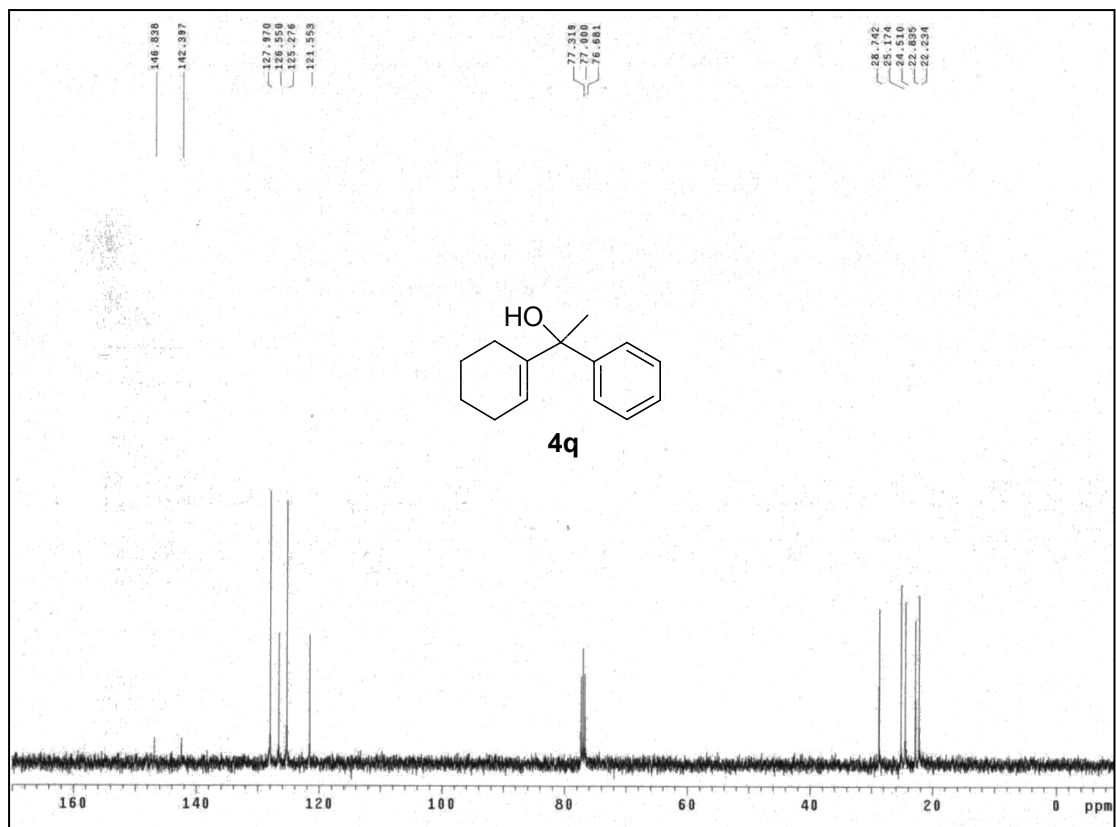



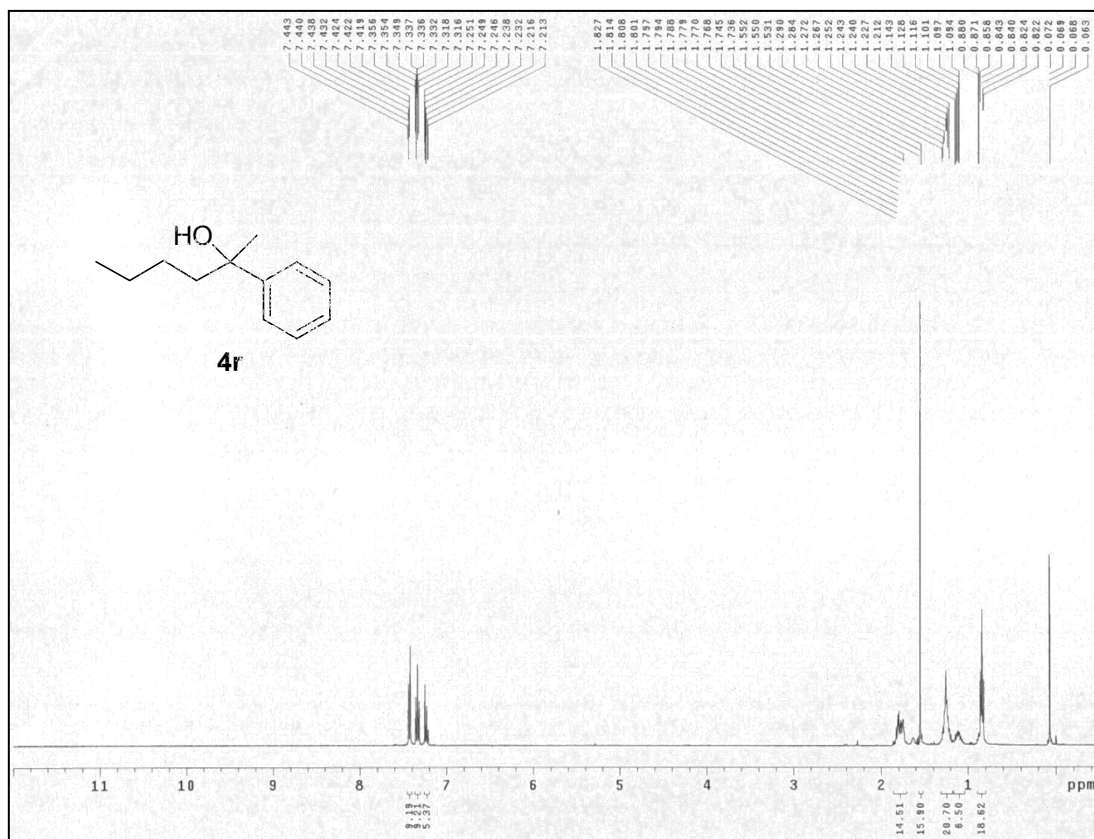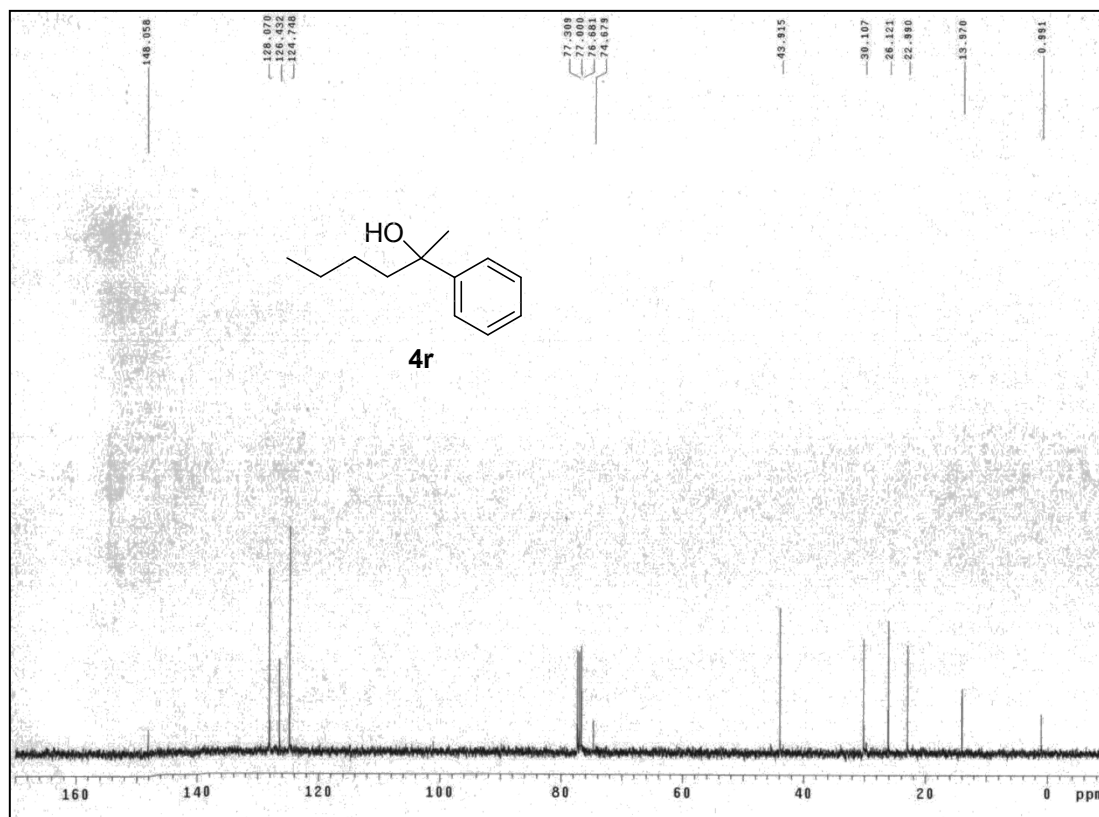

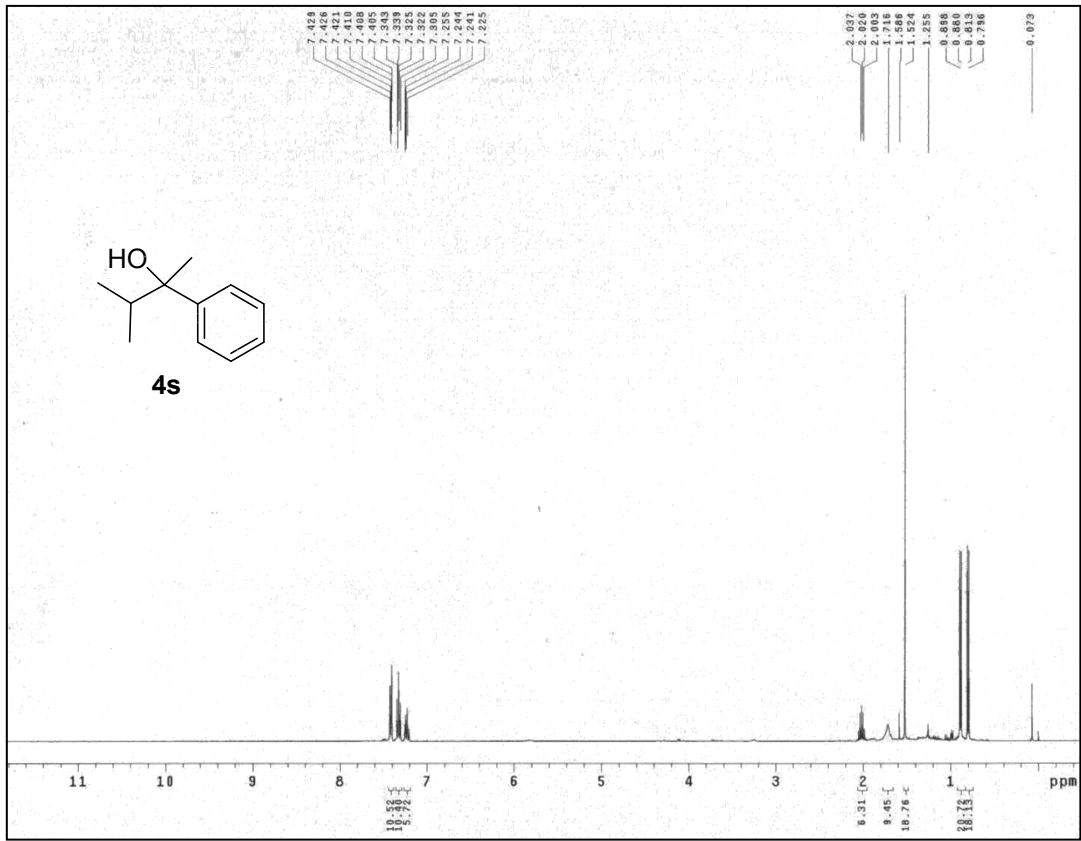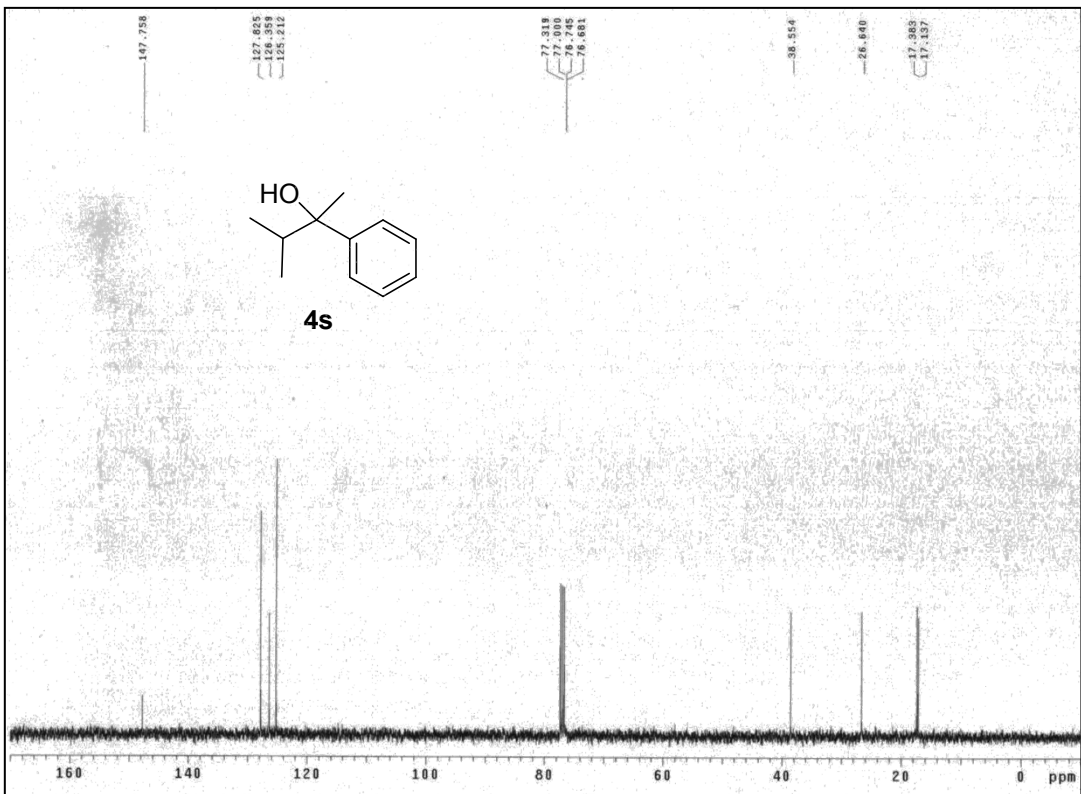

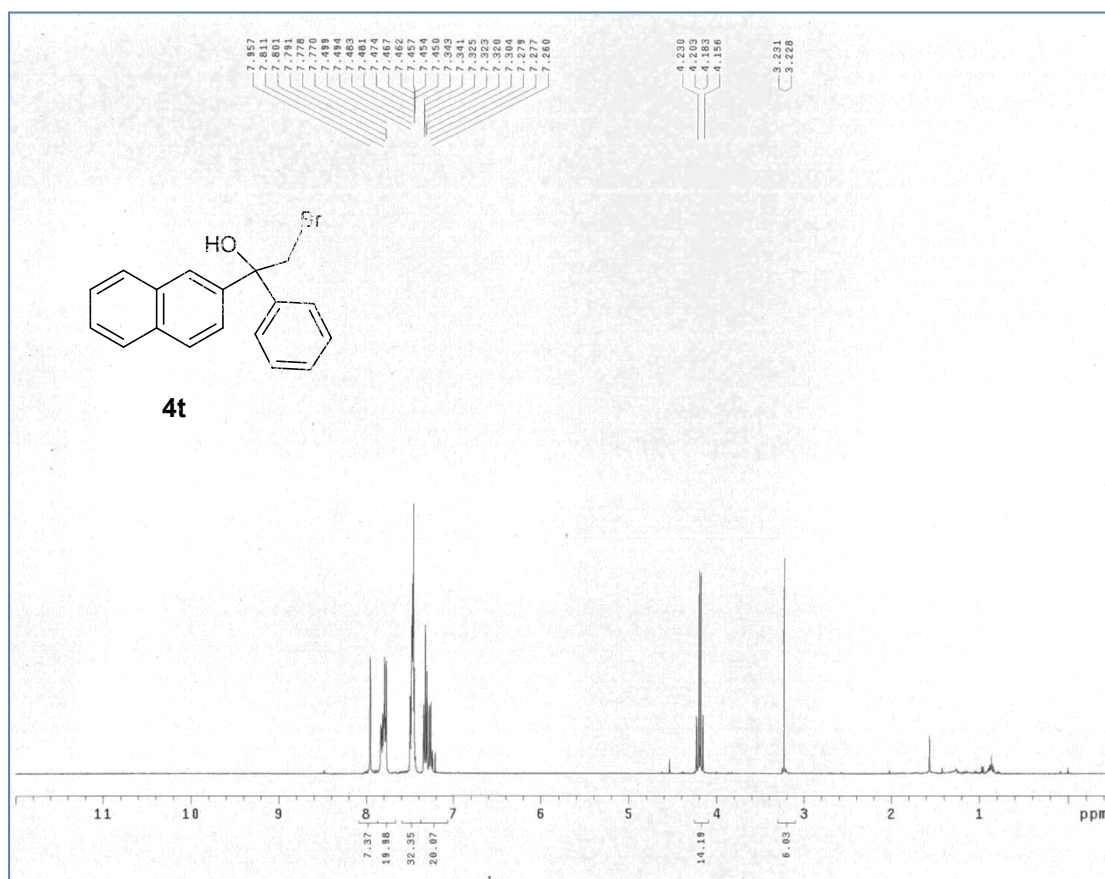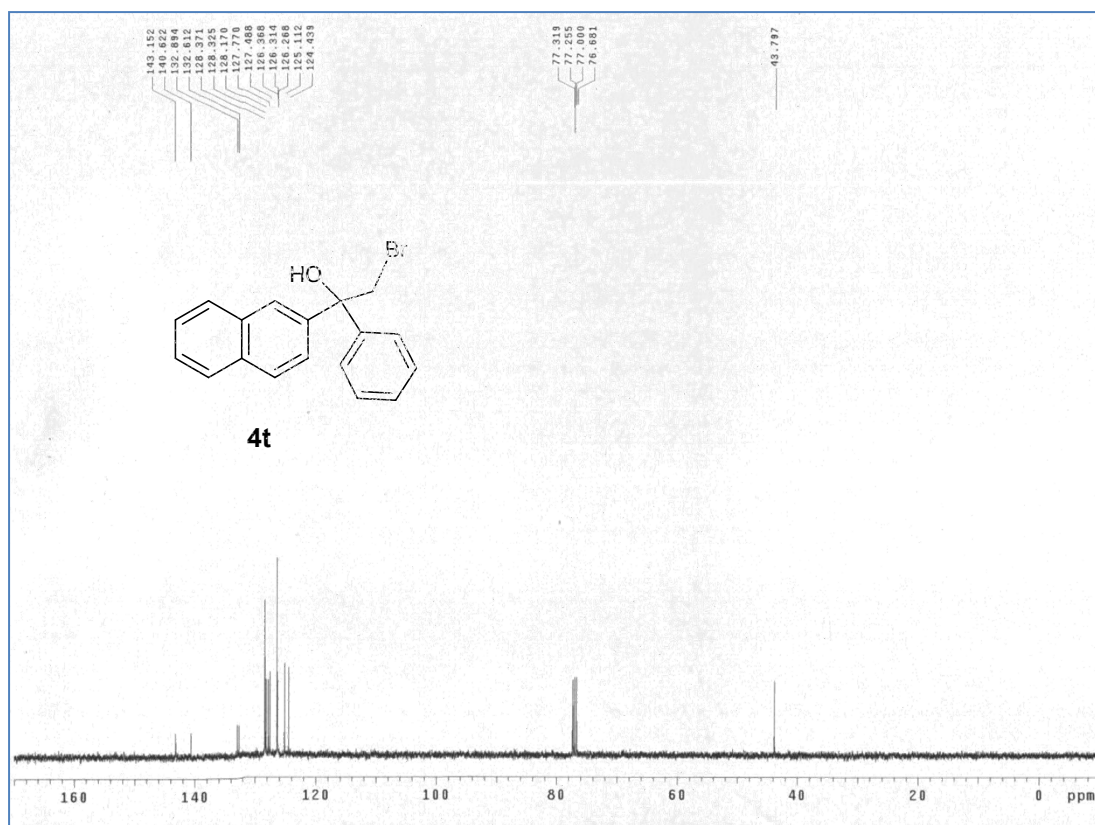

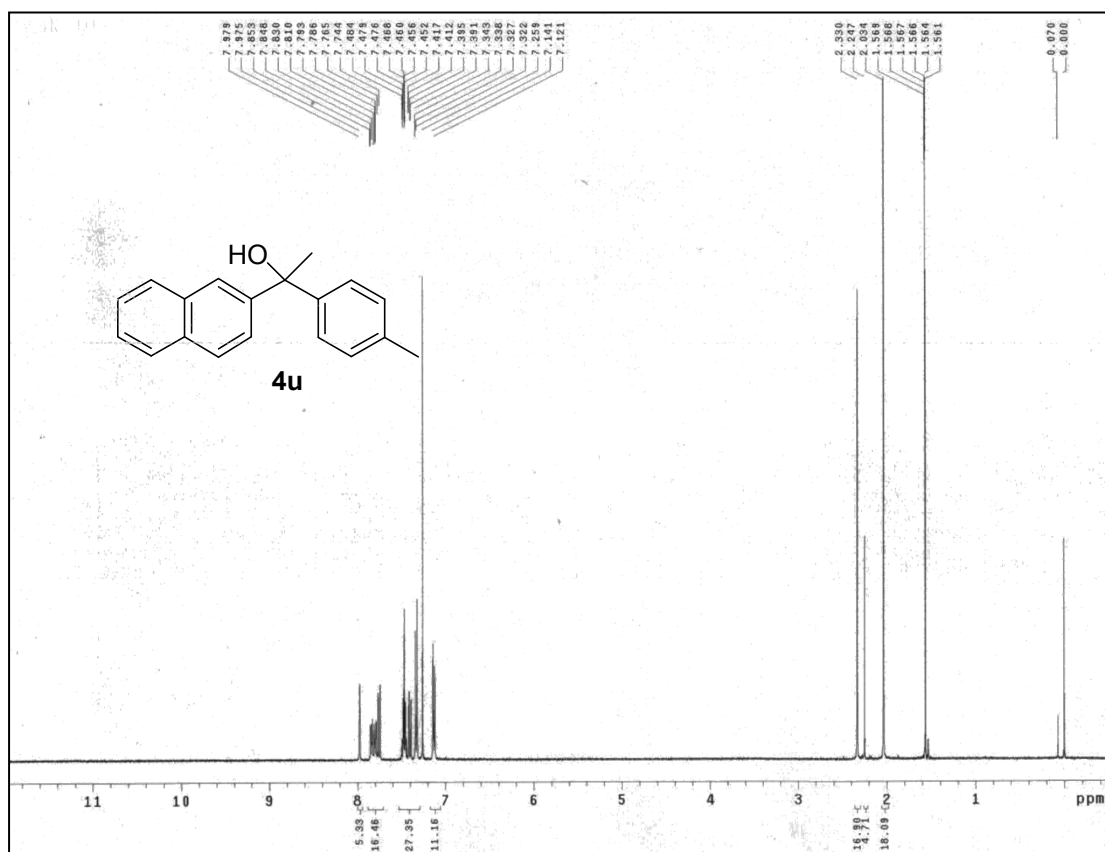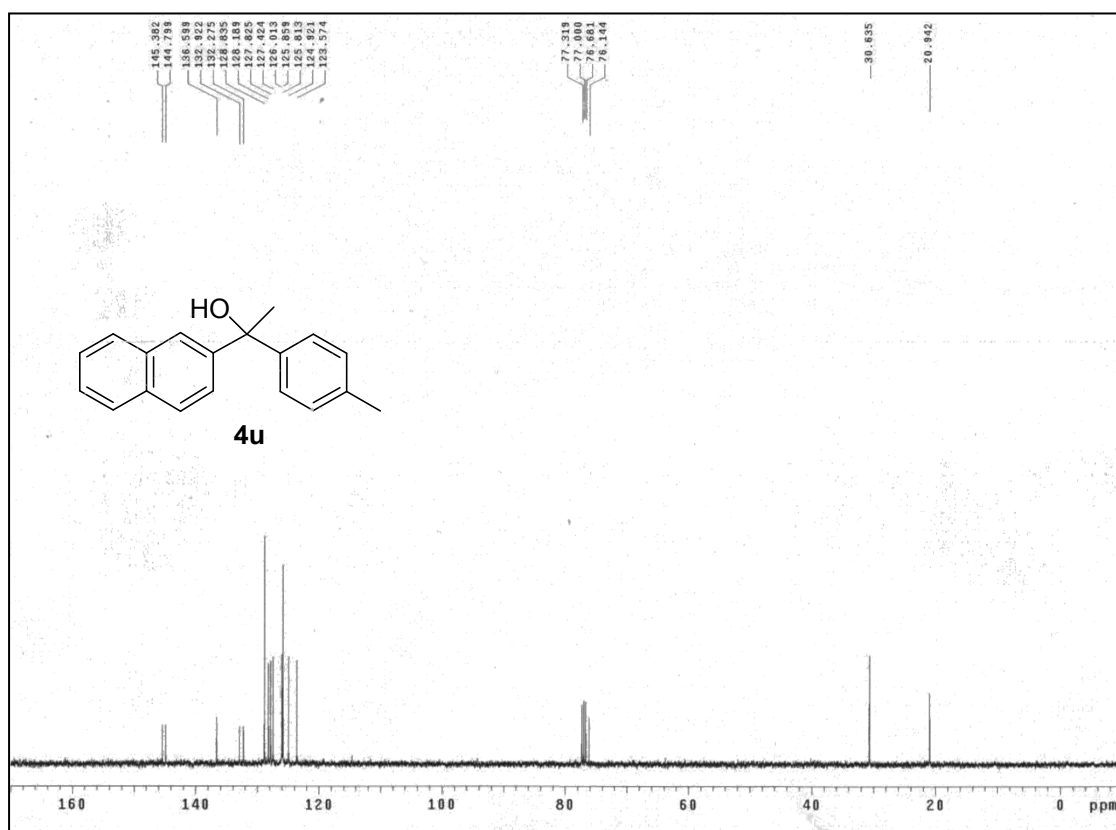

Supplement: c5ra18871g1.pdf [file c5ra18871g1.pdf]
